# Supplementary material for: High-Throughput Analysis of Gene Essentiality and Sporulation in Clostridium difficile
Source: PubMed Central journal article supplement (PMC4358009; doi:10.1128/mbio.02383-14), 2015-02-24
Supplement: mbo001152196st1.pdf [file mbo001152196st1.pdf]

## Ambiguous

| locus_tag     | Insertion Count | Insertion Index | Gene Length (bp) | Annotated Function                                                           |
|---------------|-----------------|-----------------|------------------|------------------------------------------------------------------------------|
| CDR20291_0100 | 1               | 0.001567398     | 708              | ABC transporter                                                              |
| CDR20291_0370 | 2               | 0.001958864     | 1134             | acyl-CoA dehydrogenase                                                       |
| CDR20291_0646 | 1               | 0.001754386     | 633              | methenyltetrahydrofolate cyclohydrolase                                      |
| CDR20291_0840 | 1               | 0.00154321      | 720              | putative phosphoesterase                                                     |
| CDR20291_0959 | 2               | 0.001984127     | 1119             | transposase-like protein b                                                   |
| CDR20291_0975 | 1               | 0.001949318     | 570              | electron transport complex protein                                           |
| CDR20291_1323 | 1               | 0.002028398     | 547              | putative ruberythrin                                                         |
| CDR20291_1342 | 4               | 0.00162206      | 2739             | putative two-component sensor histidine kinase                               |
| CDR20291_1416 | 1               | 0.001567398     | 708              | hypothetical protein                                                         |
| CDR20291_1709 | 1               | 0.001730104     | 642              | putative phosphoglycerate mutase                                             |
| CDR20291_1711 | 1               | 0.001706485     | 651              | cytidylate kinase                                                            |
| CDR20291_1770 | 2               | 0.001638002     | 1356             | hypothetical protein                                                         |
| CDR20291_1800 | 2               | 0.001657001     | 1341             | putative conjugative transposon mobilization protein                         |
| CDR20291_1836 | 1               | 0.001697793     | 654              | putative ethanolamine/propanediol utilization protein                        |
| CDR20291_1842 | 1               | 0.001529052     | 726              | putative ethanolamine utilization/propanediol conserved hypothetical protein |
| CDR20291_1852 | 1               | 0.001754386     | 633              | putative membrane protein                                                    |
| CDR20291_1870 | 1               | 0.001587302     | 699              | ABC transporter                                                              |
| CDR20291_2203 | 1               | 0.001517451     | 732              | conserved hypothetical protein                                               |
| CDR20291_2353 | 2               | 0.001923077     | 1155             | chaperone protein                                                            |
| CDR20291_2359 | 2               | 0.001572327     | 1413             | putative poly(A) polymerase                                                  |
| CDR20291_2444 | 1               | 0.002           | 555              | rna methyltransferase                                                        |
| CDR20291_2461 | 1               | 0.001652893     | 672              | ribulose-phosphate 3-epimerase                                               |
| CDR20291_2520 | 2               | 0.001675042     | 1326             | putative GTP-binding protein                                                 |
| CDR20291_2521 | 2               | 0.001657001     | 1341             | putative fes-containing cyanobacterial-specific oxidoreductase               |
| CDR20291_2667 | 2               | 0.002068252     | 1074             | putative mannose-1-phosphate guanylyltransferase                             |
| CDR20291_2695 | 1               | 0.001841621     | 603              | holliday junction DNA helicase                                               |
| CDR20291_2716 | 2               | 0.001986097     | 1118             | transposase-like protein B                                                   |
| CDR20291_2950 | 2               | 0.001984127     | 1119             | transposase-like protein b                                                   |

|               |   |             |                                                    |
|---------------|---|-------------|----------------------------------------------------|
| CDR20291_3090 | 3 | 0.002031144 | 1641 exosporium glycoprotein                       |
| CDR20291_3166 | 1 | 0.001897533 | 585 ATP-dependent Clp protease proteolytic subunit |
| CDR20291_3223 | 1 | 0.00155521  | 714 putative phosphoesterase                       |
| CDR20291_3472 | 1 | 0.001587302 | 699 putative abc transporter                       |
| CDR20291_3478 | 2 | 0.001984127 | 1119 transposase-like protein b                    |

## Essential Genes

| locus_tag      | Insertion Count | Insertion Index | Gene Length (bp) | Annotated Function                                     |
|----------------|-----------------|-----------------|------------------|--------------------------------------------------------|
| CDR20291_0003  | 1               | 0.000873362     | 1272             | seryl-tRNA synthetase                                  |
| CDR20291_0004A | 0               | 0               | 186              | hypothetical protein                                   |
| CDR20291_0005  | 0               | 0               | 1638             | DNA polymerase III subunit gamma/tau                   |
| CDR20291_0036  | 0               | 0               | 747              | 2-C-methyl-D-erythritol 4-phosphate cytidyltransferase |
| CDR20291_0037  | 0               | 0               | 486              | 2-C-methyl-D-erythritol 2                              |
| CDR20291_0038  | 1               | 0.000647249     | 1716             | prolyl-tRNA synthetase                                 |
| CDR20291_0040  | 0               | 0               | 1482             | glutamyl-tRNA synthetase                               |
| CDR20291_0041  | 1               | 0.000791139     | 1404             | cysteinyl-tRNA synthetase                              |
| CDR20291_0043  | 0               | 0               | 831              | thymidylate synthase                                   |
| CDR20291_0051  | 1               | 0.000932836     | 1191             | elongation factor TU                                   |
| CDR20291_0052  | 0               | 0               | 150              | 50S ribosomal protein L33                              |
| CDR20291_0053  | 0               | 0               | 222              | preprotein translocase SecE subunit                    |
| CDR20291_0054  | 0               | 0               | 543              | transcription antitermination protein                  |
| CDR20291_0055  | 0               | 0               | 426              | 50S ribosomal protein L11                              |
| CDR20291_0056  | 0               | 0               | 699              | 50S ribosomal protein L1                               |
| CDR20291_0057  | 0               | 0               | 507              | 50S ribosomal protein L10                              |
| CDR20291_0060  | 0               | 0               | 3717             | DNA-directed RNA polymerase beta chain                 |
| CDR20291_0061  | 1               | 0.000318674     | 3486             | DNA-directed RNA polymerase beta' chain                |
| CDR20291_0062  | 0               | 0               | 426              | 30S ribosomal protein S12                              |
| CDR20291_0063  | 0               | 0               | 471              | 30S ribosomal protein S7                               |
| CDR20291_0064  | 1               | 0.000537346     | 2067             | translation elongation factor G                        |
| CDR20291_0065  | 0               | 0               | 1192             | elongation factor TU                                   |
| CDR20291_0067  | 0               | 0               | 630              | 50S ribosomal protein L3                               |
| CDR20291_0068  | 0               | 0               | 654              | 50S ribosomal protein L4                               |
| CDR20291_0069  | 0               | 0               | 291              | 50S ribosomal protein L23                              |
| CDR20291_0070  | 0               | 0               | 831              | 50S ribosomal protein L2                               |
| CDR20291_0071  | 0               | 0               | 282              | 30S ribosomal protein S19                              |

|               |   |             |                                                                        |
|---------------|---|-------------|------------------------------------------------------------------------|
| CDR20291_0072 | 0 | 0           | 336 50S ribosomal protein L22                                          |
| CDR20291_0073 | 0 | 0           | 816 30S ribosomal protein S3                                           |
| CDR20291_0074 | 0 | 0           | 432 50S ribosomal protein L16                                          |
| CDR20291_0075 | 0 | 0           | 204 50S ribosomal protein L29                                          |
| CDR20291_0076 | 0 | 0           | 255 30S ribosomal protein S17                                          |
| CDR20291_0078 | 0 | 0           | 309 50S ribosomal protein L24                                          |
| CDR20291_0079 | 0 | 0           | 543 50S ribosomal protein L5                                           |
| CDR20291_0080 | 0 | 0           | 186 30S ribosomal protein S14                                          |
| CDR20291_0081 | 0 | 0           | 399 30S ribosomal protein S8                                           |
| CDR20291_0082 | 0 | 0           | 543 50S ribosomal protein L6                                           |
| CDR20291_0083 | 0 | 0           | 369 50S ribosomal protein L18                                          |
| CDR20291_0084 | 0 | 0           | 510 30S ribosomal protein S5                                           |
| CDR20291_0085 | 0 | 0           | 186 50S ribosomal protein L30                                          |
| CDR20291_0086 | 0 | 0           | 444 50S ribosomal protein L15                                          |
| CDR20291_0087 | 0 | 0           | 1269 preprotein translocase SecY subunit                               |
| CDR20291_0088 | 0 | 0           | 666 adenylate kinase                                                   |
| CDR20291_0089 | 0 | 0           | 747 methionine aminopeptidase                                          |
| CDR20291_0090 | 0 | 0           | 279 putative ribosomal protein                                         |
| CDR20291_0091 | 0 | 0           | 219 translation initiation factor IF-1                                 |
| CDR20291_0092 | 0 | 0           | 114 50S ribosomal protein L36                                          |
| CDR20291_0093 | 0 | 0           | 372 30S ribosomal protein S13                                          |
| CDR20291_0094 | 0 | 0           | 399 30S ribosomal protein S11                                          |
| CDR20291_0095 | 0 | 0           | 624 30S ribosomal protein S4                                           |
| CDR20291_0096 | 0 | 0           | 948 DNA-directed RNA polymerase alpha chain                            |
| CDR20291_0097 | 0 | 0           | 342 50S ribosomal protein L17                                          |
| CDR20291_0102 | 0 | 0           | 343 50S ribosomal protein L13                                          |
| CDR20291_0103 | 0 | 0           | 393 30S ribosomal protein S9                                           |
| CDR20291_0106 | 1 | 0.000472367 | 2352 anaerobic ribonucleoside-triphosphate reductase                   |
| CDR20291_0107 | 0 | 0           | 540 anaerobic ribonucleoside-triphosphate reductase activating protein |
| CDR20291_0110 | 0 | 0           | 120 conserved hypothetical protein                                     |

|                |   |             |                                                              |
|----------------|---|-------------|--------------------------------------------------------------|
| CDR20291_0118  | 0 | 0           | 1407 phosphoglucomutase/phosphomannomutase mutase            |
| CDR20291_0119  | 0 | 0           | 1833 glucosamine--fructose-6-phosphate aminotransferase      |
| CDR20291_0122  | 1 | 0.000873362 | 1272 UDP-N-acetylglucosamine 1-carboxyvinyltransferase 1     |
| CDR20291_0126  | 1 | 0.001089325 | 1020 rod shape-determining protein                           |
| CDR20291_0127  | 0 | 0           | 429 (3R)-hydroxymyristoyl-[acyl carrier protein] dehydratase |
| CDR20291_0129  | 0 | 0           | 1194 S-adenosylmethionine synthetase                         |
| CDR20291_0142  | 1 | 0.00041511  | 2676 preprotein translocase SecA subunit                     |
| CDR20291_0143  | 1 | 0.001091703 | 1017 peptide chain release factor 2                          |
| CDR20291_0149  | 0 | 0           | 702 putative glycoprotease                                   |
| CDR20291_0150  | 0 | 0           | 429 putative ribosomal-protein-alanine acetyltransferase     |
| CDR20291_0173  | 0 | 0           | 168 ferredoxin                                               |
| CDR20291_0194  | 0 | 0           | 285 10 kDa chaperonin                                        |
| CDR20291_0195  | 1 | 0.000681663 | 1629 60 kDa chaperonin                                       |
| CDR20291_0198  | 1 | 0.000723066 | 1536 GMP synthase                                            |
| CDR20291_0338  | 0 | 0           | 1599 manganese-dependent inorganic pyrophosphatase           |
| CDR20291_0351  | 0 | 0           | 693 putative phosphoesterase                                 |
| CDR20291_0374  | 0 | 0           | 927 putative fructose-bisphosphate aldolase                  |
| CDR20291_0377  | 0 | 0           | 1119 transposase-like protein b                              |
| CDR20291_0382  | 1 | 0.001234568 | 900 integrase                                                |
| CDR20291_0405A | 0 | 0           | 168 hypothetical protein                                     |
| CDR20291_0447A | 0 | 0           | 153 conserved hypothetical protein                           |
| CDR20291_0472  | 0 | 0           | 360 putative penicillin-binding protein repressor            |
| CDR20291_0481  | 1 | 0.001468429 | 756 putative endonuclease                                    |
| CDR20291_0498  | 1 | 0.000551876 | 2013 threonyl-tRNA synthetase                                |
| CDR20291_0500  | 0 | 0           | 1119 transposase-like protein b                              |
| CDR20291_0526  | 0 | 0           | 201 putative membrane protein                                |
| CDR20291_0554A | 0 | 0           | 240 conserved hypothetical protein                           |
| CDR20291_0581  | 0 | 0           | 555 putative transcriptional regulator                       |
| CDR20291_0611  | 0 | 0           | 423 translation initiation factor IF-3                       |
| CDR20291_0612  | 0 | 0           | 195 50S ribosomal protein L35                                |

|               |   |             |                                                                                |
|---------------|---|-------------|--------------------------------------------------------------------------------|
| CDR20291_0613 | 0 | 0           | 357 50S ribosomal protein L20                                                  |
| CDR20291_0622 | 0 | 0           | 1335 probable cation transport protein                                         |
| CDR20291_0623 | 0 | 0           | 672 putative cation transport protein                                          |
| CDR20291_0625 | 1 | 0.001078749 | 1029 phenylalanyl-tRNA synthetase alpha chain                                  |
| CDR20291_0626 | 0 | 0           | 2394 phenylalanyl-tRNA synthetase beta chain                                   |
| CDR20291_0627 | 0 | 0           | 609 putative cell-division protein                                             |
| CDR20291_0637 | 0 | 0           | 1701 arginyl-tRNA synthetase                                                   |
| CDR20291_0645 | 1 | 0.000662252 | 1677 formate--tetrahydrofolate ligase                                          |
| CDR20291_0647 | 1 | 0.001272265 | 873 putative FOLD bifunctional protein [includes: methylenetetrahydrofolate de |
| CDR20291_0697 | 1 | 0.000992063 | 1119 transposase-like protein b                                                |
| CDR20291_0712 | 0 | 0           | 2694 penicillin-binding protein                                                |
| CDR20291_0725 | 1 | 0.001468429 | 756 NH3-dependent NAD(+) synthetase                                            |
| CDR20291_0809 | 0 | 0           | 1119 transposase-like protein B                                                |
| CDR20291_0828 | 0 | 0           | 1506 conserved hypothetical protein                                            |
| CDR20291_0868 | 0 | 0           | 483 putative membrane protein                                                  |
| CDR20291_0896 | 4 | 0.00128123  | 3468 ATP-dependent nuclease subunit B                                          |
| CDR20291_0905 | 0 | 0           | 801 putative inorganic polyphosphate/ATP-NAD kinase                            |
| CDR20291_0965 | 0 | 0           | 603 putative dephospho-CoA kinase                                              |
| CDR20291_0980 | 0 | 0           | 585 septum formation protein                                                   |
| CDR20291_0981 | 0 | 0           | 660 DNA repair protein                                                         |
| CDR20291_0982 | 0 | 0           | 1062 rod shape-determining protein                                             |
| CDR20291_0983 | 0 | 0           | 894 putative rod shape-determining protein                                     |
| CDR20291_0984 | 0 | 0           | 489 putative membrane protein                                                  |
| CDR20291_0985 | 2 | 0.000745712 | 2979 putative penicillin-binding protein                                       |
| CDR20291_0986 | 0 | 0           | 684 septum site-determining protein                                            |
| CDR20291_0987 | 0 | 0           | 798 septum site-determining protein (cell division inhibitor)                  |
| CDR20291_0988 | 0 | 0           | 285 cell division topological specificity factor                               |
| CDR20291_0989 | 0 | 0           | 1131 rod shape-determining protein                                             |
| CDR20291_0998 | 0 | 0           | 312 50S ribosomal protein L21                                                  |
| CDR20291_1000 | 0 | 0           | 291 50S ribosomal protein L27                                                  |

|               |   |             |                                                                                 |
|---------------|---|-------------|---------------------------------------------------------------------------------|
| CDR20291_1001 | 0 | 0           | 1287 Spo0B-associated GTP-binding protein                                       |
| CDR20291_1014 | 0 | 0           | 174 50S ribosomal protein L32                                                   |
| CDR20291_1015 | 0 | 0           | 558 DeoR-family transcriptional regulator (fatty acid and phospholipid biosyntf |
| CDR20291_1016 | 0 | 0           | 1023 fatty acid/phospholipid synthesis protein                                  |
| CDR20291_1017 | 0 | 0           | 987 3-oxoacyl-[acyl-carrier-protein] synthase III                               |
| CDR20291_1018 | 0 | 0           | 930 trans-2-enoyl-ACP reductase                                                 |
| CDR20291_1019 | 1 | 0.001168224 | 951 malonyl coa-acyl carrier protein transacylase                               |
| CDR20291_1020 | 0 | 0           | 750 3-oxoacyl-[acyl-carrier protein] reductase                                  |
| CDR20291_1021 | 0 | 0           | 225 acyl carrier protein                                                        |
| CDR20291_1022 | 0 | 0           | 1239 3-oxoacyl-[acyl-carrier-protein] synthase II                               |
| CDR20291_1025 | 0 | 0           | 249 conserved hypothetical protein                                              |
| CDR20291_1032 | 0 | 0           | 213 stage III sporulation protein AC                                            |
| CDR20291_1038 | 0 | 0           | 363 conserved hypothetical protein                                              |
| CDR20291_1044 | 0 | 0           | 438 putative membrane protein                                                   |
| CDR20291_1053 | 0 | 0           | 1122 putative pyrophosphokinase                                                 |
| CDR20291_1054 | 1 | 0.001267427 | 876 putative exported protein                                                   |
| CDR20291_1055 | 0 | 0           | 693 putative glycosyltransferase                                                |
| CDR20291_1056 | 0 | 0           | 825 putative glycosyltransferase                                                |
| CDR20291_1057 | 1 | 0.001039501 | 1068 conserved hypothetical protein                                             |
| CDR20291_1071 | 0 | 0           | 672 hypothetical protein                                                        |
| CDR20291_1072 | 0 | 0           | 900 integrase                                                                   |
| CDR20291_107A | 0 | 0           | 414 hypothetical protein                                                        |
| CDR20291_1085 | 0 | 0           | 573 elongation factor P                                                         |
| CDR20291_1087 | 0 | 0           | 711 putative ribonuclease III                                                   |
| CDR20291_1090 | 0 | 0           | 1281 putative signal recognition particle                                       |
| CDR20291_1091 | 0 | 0           | 369 putative DNA-binding regulator                                              |
| CDR20291_1092 | 0 | 0           | 1344 signal recognition particle protein                                        |
| CDR20291_1093 | 0 | 0           | 273 30S ribosomal protein S16                                                   |
| CDR20291_1095 | 0 | 0           | 516 putative 16S rRNA processing protein                                        |
| CDR20291_1096 | 0 | 0           | 696 tRNA (Guanine-n(1)-)-methyltransferase                                      |

|               |   |             |                                                                            |
|---------------|---|-------------|----------------------------------------------------------------------------|
| CDR20291_1097 | 0 | 0           | 351 50S ribosomal protein L19                                              |
| CDR20291_1098 | 0 | 0           | 906 putative GTPase                                                        |
| CDR20291_1115 | 0 | 0           | 786 GTP-sensing transcriptional pleiotropic repressor                      |
| CDR20291_1119 | 0 | 0           | 1203 cysteine desulfurase                                                  |
| CDR20291_1120 | 0 | 0           | 441 NifU-like protein                                                      |
| CDR20291_1121 | 0 | 0           | 1080 putative tRNA (5-methylaminomethyl-2-thiouridylate)-methyltransferase |
| CDR20291_1122 | 0 | 0           | 2640 putative alanyl-tRNA synthetase                                       |
| CDR20291_1124 | 0 | 0           | 2172 putative membrane protein                                             |
| CDR20291_1130 | 0 | 0           | 201 putative small acid-soluble spore protein                              |
| CDR20291_1146 | 2 | 0.000516796 | 4299 DNA polymerase III PolC-type                                          |
| CDR20291_1148 | 0 | 0           | 1155 transcription elongation protein                                      |
| CDR20291_1149 | 0 | 0           | 279 uncharacterised protein                                                |
| CDR20291_1150 | 0 | 0           | 312 putative ribosomal protein                                             |
| CDR20291_1151 | 0 | 0           | 1941 translation initiation factor IF-2                                    |
| CDR20291_1153 | 1 | 0.001098901 | 1011 putative RNA-binding protein                                          |
| CDR20291_1155 | 0 | 0           | 930 riboflavin biosynthesis protein                                        |
| CDR20291_1156 | 0 | 0           | 99 conserved hypothetical protein                                          |
| CDR20291_1157 | 0 | 0           | 258 30S ribosomal protein S15                                              |
| CDR20291_1159 | 1 | 0.000526039 | 2112 polyribonucleotide nucleotidyltransferase                             |
| CDR20291_1163 | 1 | 0.000907441 | 1224 aspartokinase                                                         |
| CDR20291_1168 | 0 | 0           | 552 CDP-diacylglycerol--glycerol-3-phosphate 3-phosphatidyltransferase     |
| CDR20291_1170 | 0 | 0           | 1542 putative nucleic acid-binding protein                                 |
| CDR20291_1171 | 2 | 0.001246883 | 1782 putative DNA helicase                                                 |
| CDR20291_1195 | 0 | 0           | 822 putative pyridoxine kinase                                             |
| CDR20291_1197 | 0 | 0           | 201 putative cold shock protein                                            |
| CDR20291_1202 | 0 | 0           | 321 putative phage repressor                                               |
| CDR20291_1203 | 0 | 0           | 198 putative phage regulatory protein                                      |
| CDR20291_1209 | 0 | 0           | 168 conserved hypothetical protein                                         |
| CDR20291_1213 | 0 | 0           | 327 putative phage protein                                                 |
| CDR20291_1223 | 0 | 0           | 207 putative phage regulatory protein                                      |



|                |   |             |                                                                         |
|----------------|---|-------------|-------------------------------------------------------------------------|
| CDR20291_1254  | 0 | 0           | 1449 GntR-family transcriptional regulator                              |
| CDR20291_1255  | 0 | 0           | 900 D-alanine--D-alanine ligase B                                       |
| CDR20291_1298  | 0 | 0           | 573 putative GTP cyclohydrolase I                                       |
| CDR20291_1299  | 1 | 0.001381215 | 804 dihydropteroate synthase                                            |
| CDR20291_1300  | 0 | 0           | 366 dihydroneopterin aldolase                                           |
| CDR20291_1301  | 0 | 0           | 507 2-amino-4-hydroxy-6-hydroxymethyldihydropteridine pyrophosphokinase |
| CDR20291_1303  | 0 | 0           | 1827 DNA primase                                                        |
| CDR20291_1304  | 0 | 0           | 1167 RNA polymerase sigma factor (sigma-43)                             |
| CDR20291_1338  | 1 | 0.000992063 | 1119 transposase-like protein b                                         |
| CDR20291_1370  | 0 | 0           | 1209 tyrosyl-tRNA synthetase                                            |
| CDR20291_1393  | 0 | 0           | 210 conserved hypothetical protein                                      |
| CDR20291_1418B | 0 | 0           | 342 Transcriptional regulator                                           |
| CDR20291_1419A | 0 | 0           | 144 hypothetical protein                                                |
| CDR20291_1436A | 0 | 0           | 234 putative phage protein                                              |
| CDR20291_1459  | 0 | 0           | 183 hypothetical phage protein                                          |
| CDR20291_1464A | 0 | 0           | 177 hypothetical protein                                                |
| CDR20291_1469  | 0 | 0           | 756 transposase-like protein b                                          |
| CDR20291_1675  | 1 | 0.000966184 | 1149 putative methylase                                                 |
| CDR20291_1676  | 1 | 0.000799361 | 1389 putative lipoprotein                                               |
| CDR20291_1677  | 0 | 0           | 735 two-component response regulator                                    |
| CDR20291_1678  | 0 | 0           | 1434 two-component sensor histidine kinase                              |
| CDR20291_1712  | 0 | 0           | 597 putative acyltransferase                                            |
| CDR20291_1713  | 1 | 0.001322751 | 840 putative 4-hydroxy-3-methylbut-2-enyl diphosphate reductase         |
| CDR20291_1744  | 0 | 0           | 1881 site-specific recombinase                                          |
| CDR20291_1745  | 0 | 0           | 351 hypothetical protein                                                |
| CDR20291_1747  | 0 | 0           | 366 putative uncharacterized protein                                    |
| CDR20291_1750  | 1 | 0.001157407 | 960 putative lantibiotic abc transporter                                |
| CDR20291_1752  | 1 | 0.001428571 | 777 putative lantibiotic abc transporter                                |
| CDR20291_1755  | 0 | 0           | 450 sigma-24 (feci)                                                     |
| CDR20291_1756  | 0 | 0           | 495 rna polymerase                                                      |

|                |   |             |                                                                      |
|----------------|---|-------------|----------------------------------------------------------------------|
| CDR20291_1757  | 0 | 0           | 297 hypothetical protein                                             |
| CDR20291_1758  | 0 | 0           | 1452 putative endonuclease relaxase Tn1549-like                      |
| CDR20291_1760  | 0 | 0           | 366 addiction module antitoxin                                       |
| CDR20291_1762  | 0 | 0           | 735 phage protein                                                    |
| CDR20291_1767  | 0 | 0           | 480 hypothetical protein                                             |
| CDR20291_1768  | 0 | 0           | 999 hypothetical protein                                             |
| CDR20291_1769  | 0 | 0           | 558 hypothetical protein                                             |
| CDR20291_1773  | 0 | 0           | 435 putative RNA polymerase sigma factor Tn5397                      |
| CDR20291_1778  | 0 | 0           | 432 hypothetical protein                                             |
| CDR20291_1781  | 0 | 0           | 339 hypothetical protein                                             |
| CDR20291_1782  | 0 | 0           | 294 hypothetical protein                                             |
| CDR20291_1783  | 0 | 0           | 159 hypothetical protein                                             |
| CDR20291_1784  | 0 | 0           | 1227 putative endonuclease relaxase Tn1549-like                      |
| CDR20291_1786  | 0 | 0           | 1329 hypothetical protein                                            |
| CDR20291_1788  | 1 | 0.000664894 | 1671 hypothetical protein                                            |
| CDR20291_1793  | 2 | 0.001240695 | 1791 putative DNA topoisomerase                                      |
| CDR20291_1839  | 0 | 0           | 288 putative ethanolamine/propanediol utilization protein            |
| CDR20291_1854  | 0 | 0           | 681 SOS regulatory protein                                           |
| CDR20291_1859  | 0 | 0           | 945 acetyl-coenzyme A carboxylase carboxyl transferase subunit alpha |
| CDR20291_1860  | 0 | 0           | 855 acetyl-coenzyme A carboxylase carboxyl transferase subunit beta  |
| CDR20291_1861  | 0 | 0           | 1362 biotin carboxylase (acetyl-CoA carboxylase subunit A)           |
| CDR20291_1862  | 0 | 0           | 453 biotin carboxyl carrier protein of acetyl-CoA carboxylase        |
| CDR20291_1906  | 1 | 0.000992063 | 1119 transposase-like protein b                                      |
| CDR20291_1914A | 0 | 0           | 183 hypothetical protein                                             |
| CDR20291_1914B | 0 | 0           | 177 conserved hypothetical protein                                   |
| CDR20291_1920A | 0 | 0           | 135 conserved hypothetical protein                                   |
| CDR20291_1930  | 0 | 0           | 372 putative phage regulatory protein                                |
| CDR20291_1966  | 0 | 0           | 1665 putative glutaminyl-tRNA synthetase                             |
| CDR20291_2020  | 1 | 0.00086881  | 1278 two-component sensor histidine kinase                           |
| CDR20291_2029  | 1 | 0.00118624  | 936 putative cations transporter                                     |

|                |   |             |                                                           |
|----------------|---|-------------|-----------------------------------------------------------|
| CDR20291_2035  | 1 | 0.001051525 | 1056 4-hydroxy-3-methylbut-2-en-1-yl diphosphate synthase |
| CDR20291_2037  | 1 | 0.000961538 | 1155 1-deoxy-d-xylulose 5-phosphate reductoisomerase      |
| CDR20291_2041  | 0 | 0           | 780 putative phosphatidate cytidyltransferase             |
| CDR20291_2042  | 0 | 0           | 735 undecaprenyl pyrophosphate synthetase                 |
| CDR20291_2044  | 0 | 0           | 558 ribosome recycling factor                             |
| CDR20291_2045  | 0 | 0           | 705 uridylate kinase                                      |
| CDR20291_2046  | 0 | 0           | 912 elongation factor Ts                                  |
| CDR20291_2047  | 0 | 0           | 714 30S ribosomal protein S2                              |
| CDR20291_2106  | 0 | 0           | 237 putative oxidoreductase                               |
| CDR20291_2144  | 0 | 0           | 1398 asparaginyl-tRNA synthetase                          |
| CDR20291_2193  | 0 | 0           | 186 hypothetical protein                                  |
| CDR20291_2196  | 1 | 0.001356852 | 818 integrase                                             |
| CDR20291_2197  | 0 | 0           | 672 transposase                                           |
| CDR20291_2199  | 0 | 0           | 201 cold shock protein                                    |
| CDR20291_2202  | 0 | 0           | 696 ABC transporter                                       |
| CDR20291_2224  | 1 | 0.000740741 | 1500 inosine-5'-monophosphate dehydrogenase               |
| CDR20291_2299A | 0 | 0           | 318 hypothetical protein                                  |
| CDR20291_2300  | 0 | 0           | 270 conserved hypothetical protein                        |
| CDR20291_2309  | 0 | 0           | 546 PTS system                                            |
| CDR20291_2324  | 0 | 0           | 2067 glycyl-tRNA synthetase beta chain                    |
| CDR20291_2325  | 0 | 0           | 879 glycyl-tRNA synthetase alpha chain                    |
| CDR20291_2329  | 1 | 0.001242236 | 894 GTP-binding protein                                   |
| CDR20291_2332  | 0 | 0           | 462 putative metal-dependent hydrolase                    |
| CDR20291_2339  | 0 | 0           | 180 30S ribosomal protein S21                             |
| CDR20291_2354  | 2 | 0.001201923 | 1848 chaperone protein                                    |
| CDR20291_2355  | 0 | 0           | 621 heat shock protein                                    |
| CDR20291_2366  | 0 | 0           | 267 30S ribosomal protein S20                             |
| CDR20291_2367  | 0 | 0           | 993 putative DNA polymerase III                           |
| CDR20291_2385  | 1 | 0.000413223 | 2688 putative sensor histidine kinase                     |
| CDR20291_2410  | 0 | 0           | 2421 leucyl-tRNA synthetase                               |

|               |   |             |                                                                               |
|---------------|---|-------------|-------------------------------------------------------------------------------|
| CDR20291_2413 | 0 | 0           | 690 nicotinate-nucleotide adenyltransferase                                   |
| CDR20291_2443 | 0 | 0           | 498 phosphopantetheine adenyltransferase                                      |
| CDR20291_2460 | 0 | 0           | 642 putative thiamine pyrophosphokinase                                       |
| CDR20291_2462 | 0 | 0           | 921 putative ATP/GTP-binding protein                                          |
| CDR20291_2463 | 0 | 0           | 738 probable short chain dehydrogenase                                        |
| CDR20291_2470 | 0 | 0           | 930 methionyl-tRNA formyltransferase                                          |
| CDR20291_2472 | 0 | 0           | 2526 putative primosomal protein N'                                           |
| CDR20291_2473 | 0 | 0           | 1242 coenzyme A biosynthesis bifunctional protein                             |
| CDR20291_2474 | 0 | 0           | 267 DNA-directed RNA polymerase omega chain                                   |
| CDR20291_2475 | 0 | 0           | 618 guanylate kinase                                                          |
| CDR20291_2476 | 0 | 0           | 882 uncharacterised protein                                                   |
| CDR20291_2477 | 0 | 0           | 831 diaminopimelate epimerase                                                 |
| CDR20291_2493 | 0 | 0           | 1002 tryptophanyl-tRNA synthetase                                             |
| CDR20291_2501 | 0 | 0           | 1119 transposase-like protein b                                               |
| CDR20291_2502 | 0 | 0           | 3108 isoleucyl-tRNA synthetase                                                |
| CDR20291_2506 | 0 | 0           | 459 Cell division protein SepF                                                |
| CDR20291_2507 | 0 | 0           | 705 putative alanine racemase                                                 |
| CDR20291_2518 | 0 | 0           | 1020 glycerol-3-phosphate dehydrogenase [NAD(P)+]                             |
| CDR20291_2519 | 0 | 0           | 615 putative membrane protein                                                 |
| CDR20291_2526 | 0 | 0           | 693 two-component response regulator                                          |
| CDR20291_2534 | 1 | 0.000956938 | 1161 cell division protein                                                    |
| CDR20291_2539 | 0 | 0           | 1227 UDP-N-acetylglucosamine--N-acetylmuramyl-(penta peptide) pyrophosphatase |
| CDR20291_2541 | 0 | 0           | 1356 UDP-N-acetylmuramoylalanine--D-glutamate ligase                          |
| CDR20291_2542 | 0 | 0           | 969 phospho-N-acetylmuramoyl-pentapeptide-transferase                         |
| CDR20291_2543 | 0 | 0           | 1374 UDP-N-acetylmuramoyl-tripeptide--D-alanyl-D-alanine ligase               |
| CDR20291_2552 | 0 | 0           | 1455 putative UDP-N-acetylmuramoylalanyl-D-glutamate--2                       |
| CDR20291_2564 | 1 | 0.00094162  | 1179 putative acetyl-CoA acetyltransferase                                    |
| CDR20291_2569 | 1 | 0.001197605 | 927 putative Calcium-chelating exported protein                               |
| CDR20291_2571 | 0 | 0           | 570 putative propanediol utilization protein                                  |
| CDR20291_2602 | 1 | 0.00109529  | 1014 UDP-glucose 4-epimerase                                                  |

|                |   |             |                                                                         |
|----------------|---|-------------|-------------------------------------------------------------------------|
| CDR20291_2603  | 1 | 0.001175088 | 945 UTP--glucose-1-phosphate uridylyltransferase                        |
| CDR20291_2628  | 0 | 0           | 1788 putative aspartyl-tRNA synthetase                                  |
| CDR20291_2629  | 0 | 0           | 1263 putative histidyl-tRNA synthetase                                  |
| CDR20291_2630  | 0 | 0           | 1557 putative coproporphyrinogen III oxidase                            |
| CDR20291_2632  | 0 | 0           | 450 putative D-tyrosyl-tRNA protein                                     |
| CDR20291_2633  | 2 | 0.001006036 | 2208 putative GTP pyrophosphokinase                                     |
| CDR20291_2657  | 0 | 0           | 1914 capsular polysaccharide biosynthesis protein                       |
| CDR20291_2658  | 0 | 0           | 1092 putative capsular polysaccharide biosynthesis glycosyl transferase |
| CDR20291_2659  | 0 | 0           | 1344 putative UDP-glucose 6-dehydrogenase                               |
| CDR20291_2660  | 0 | 0           | 753 putative teichuronic acid biosynthesis glycosyl transferase         |
| CDR20291_2661  | 0 | 0           | 909 putative beta-glycosyltransferase                                   |
| CDR20291_2662  | 0 | 0           | 750 putative teichuronic acid biosynthesis glycosyl transferase         |
| CDR20291_2663  | 1 | 0.000932836 | 1191 putative minor teichoic acid biosynthesis protein                  |
| CDR20291_2664  | 1 | 0.001322751 | 840 putative glycosyl transferase                                       |
| CDR20291_2665  | 0 | 0           | 1158 putative polysaccharide polymerase                                 |
| CDR20291_2666  | 0 | 0           | 723 putative polysaccharide biosynthesis protein                        |
| CDR20291_2668  | 1 | 0.000650618 | 1707 putative phosphomannomutase/phosphoglycerate mutase                |
| CDR20291_2669  | 0 | 0           | 1560 putative transmembrane virulence factor MviN family protein        |
| CDR20291_2670  | 0 | 0           | 1056 cell surface protein                                               |
| CDR20291_2671  | 0 | 0           | 699 putative glycosyltransferase                                        |
| CDR20291_2681  | 2 | 0.00094697  | 2346 preprotein translocase SecA subunit                                |
| CDR20291_2682  | 0 | 0           | 2277 cell surface protein (S-layer precursor protein)                   |
| CDR20291_2688A | 0 | 0           | 144 conserved hypothetical protein                                      |
| CDR20291_2694  | 1 | 0.001089325 | 1020 holliday junction DNA helicase                                     |
| CDR20291_2709A | 0 | 0           | 318 hypothetical protein                                                |
| CDR20291_2723A | 0 | 0           | 186 hypothetical protein                                                |
| CDR20291_2834  | 0 | 0           | 1119 transposase-like protein b                                         |
| CDR20291_2961B | 0 | 0           | 138 hypothetical protein                                                |
| CDR20291_3004  | 1 | 0.001317523 | 843 putative phage DNA-binding protein                                  |
| CDR20291_3005  | 0 | 0           | 492 putative phage repressor                                            |

|                |   |             |                                                                |
|----------------|---|-------------|----------------------------------------------------------------|
| CDR20291_3006  | 0 | 0           | 771 putative phage protein                                     |
| CDR20291_3011  | 0 | 0           | 456 SsrA-binding protein                                       |
| CDR20291_3024  | 0 | 0           | 222 putative subunit of preprotein translocase                 |
| CDR20291_3026  | 1 | 0.000859107 | 1293 enolase                                                   |
| CDR20291_3027  | 0 | 0           | 1533 3-bisphosphoglycerate-independent phosphoglycerate mutase |
| CDR20291_3028  | 0 | 0           | 744 triosephosphate isomerase                                  |
| CDR20291_3029  | 0 | 0           | 1203 phosphoglycerate kinase                                   |
| CDR20291_3030  | 0 | 0           | 1008 glyceraldehyde-3-phosphate dehydrogenase 2                |
| CDR20291_3081  | 0 | 0           | 1119 putative amidohydrolase                                   |
| CDR20291_3084  | 0 | 0           | 1002 aspartate-semialdehyde dehydrogenase                      |
| CDR20291_3085  | 1 | 0.00125     | 888 dihydrodipicolinate synthase                               |
| CDR20291_3086  | 1 | 0.001481481 | 750 dihydrodipicolinate reductase                              |
| CDR20291_3087  | 0 | 0           | 717 5-tetrahydropyridine-2                                     |
| CDR20291_3111  | 1 | 0.000854701 | 1299 putative folylpolyglutamate synthase                      |
| CDR20291_3114  | 1 | 0.000416493 | 2667 valyl-tRNA synthetase                                     |
| CDR20291_3146  | 0 | 0           | 1350 glucose-6-phosphate isomerase                             |
| CDR20291_3161  | 0 | 0           | 585 probable GTP-binding protein                               |
| CDR20291_3162  | 1 | 0.000468823 | 2370 ATP-dependent protease La                                 |
| CDR20291_3165  | 1 | 0.000888099 | 1251 ATP-dependent Clp protease ATP-binding subunit            |
| CDR20291_3170  | 0 | 0           | 2034 DNA ligase                                                |
| CDR20291_3187A | 0 | 0           | 138 autoinducer prepeptide                                     |
| CDR20291_3217  | 0 | 0           | 960 6-phosphofructokinase                                      |
| CDR20291_3218  | 1 | 0.000311236 | 3570 DNA polymerase III alpha subunit                          |
| CDR20291_3219  | 1 | 0.00117096  | 948 putative sporulation transcription regulator whiA          |
| CDR20291_3224  | 0 | 0           | 954 UDP-N-acetylenolpyruvoylglucosamine reductase              |
| CDR20291_3261B | 0 | 0           | 120 conserved hypothetical protein                             |
| CDR20291_3302  | 0 | 0           | 381 holo-[acyl-carrier protein] synthase                       |
| CDR20291_3303  | 0 | 0           | 261 ATP synthase epsilon chain (partial)                       |
| CDR20291_3304  | 0 | 0           | 1395 ATP synthase beta chain                                   |
| CDR20291_3305  | 0 | 0           | 843 ATP synthase subunit gamma                                 |

|                |   |             |                                                                               |
|----------------|---|-------------|-------------------------------------------------------------------------------|
| CDR20291_3306  | 0 | 0           | 1503 ATP synthase alpha chain                                                 |
| CDR20291_3307  | 0 | 0           | 546 ATP synthase subunit delta                                                |
| CDR20291_3308  | 0 | 0           | 516 ATP synthase B chain                                                      |
| CDR20291_3310  | 0 | 0           | 705 ATP synthase A chain                                                      |
| CDR20291_3311  | 0 | 0           | 387 ATP synthase protein I                                                    |
| CDR20291_3312  | 0 | 0           | 228 putative ATP synthase protein                                             |
| CDR20291_3318  | 0 | 0           | 1062 putative RNA-binding protein                                             |
| CDR20291_3320  | 0 | 0           | 1065 peptide chain release factor 1                                           |
| CDR20291_3323  | 0 | 0           | 201 50S ribosomal protein L31                                                 |
| CDR20291_3333  | 0 | 0           | 279 DNA-binding protein HU                                                    |
| CDR20291_3335  | 0 | 0           | 1614 stage V sporulation protein B                                            |
| CDR20291_3339  | 0 | 0           | 561 peptidyl-tRNA hydrolase                                                   |
| CDR20291_3351  | 0 | 0           | 951 ribose-phosphate pyrophosphokinase                                        |
| CDR20291_3352  | 1 | 0.000805153 | 1380 bifunctional protein [includes: UDP-N- acetylglucosamine pyrophosphoryla |
| CDR20291_3355  | 0 | 0           | 1353 UDP-N-acetylmuramate--L-alanine ligase                                   |
| CDR20291_3375  | 2 | 0.001146132 | 1938 methionyl-tRNA synthetase                                                |
| CDR20291_3378  | 1 | 0.000776398 | 1431 putative nicotinate phosphoribosyltransferase                            |
| CDR20291_3384  | 1 | 0.00118624  | 936 putative DNA polymerase III                                               |
| CDR20291_3385  | 0 | 0           | 705 putative thymidylate kinase                                               |
| CDR20291_3389  | 0 | 0           | 1530 lysyl-tRNA synthetase                                                    |
| CDR20291_3390  | 0 | 0           | 480 transcription elongation factor grea                                      |
| CDR20291_3392  | 0 | 0           | 771 Type III pantothenate kinase (Pantothenic acid kinase) (PanK-III)         |
| CDR20291_3397  | 0 | 0           | 1389 putative ATPase                                                          |
| CDR20291_3399  | 0 | 0           | 807 glutamate racemase                                                        |
| CDR20291_3403  | 0 | 0           | 921 4-diphosphocytidyl-2-c-methyl-D-erythritol kinase                         |
| CDR20291_3473A | 0 | 0           | 141 hypothetical protein                                                      |
| CDR20291_3473B | 0 | 0           | 192 hypothetical protein                                                      |
| CDR20291_3512  | 1 | 0.001048218 | 1059 DNA replication protein DnaD/DnaB                                        |
| CDR20291_3513  | 0 | 0           | 993 putative DNA replication protein                                          |
| CDR20291_3516  | 0 | 0           | 1329 replicative DNA helicase                                                 |

|               |   |             |                                                   |
|---------------|---|-------------|---------------------------------------------------|
| CDR20291_3517 | 0 | 0           | 450 50S ribosomal protein L9                      |
| CDR20291_3518 | 1 | 0.000556793 | 1995 putative RNA/single-stranded DNA exonuclease |
| CDR20291_3519 | 1 | 0.001197605 | 927 putative membrane protein                     |
| CDR20291_3520 | 0 | 0           | 321 uncharacterised protein                       |
| CDR20291_3522 | 0 | 0           | 435 single-strand binding protein                 |
| CDR20291_3523 | 0 | 0           | 279 30S ribosomal protein S6                      |
| CDR20291_3525 | 0 | 0           | 186 conserved hypothetical protein                |
| CDR20291_3526 | 0 | 0           | 264 conserved hypothetical protein                |
| CDR20291_3535 | 2 | 0.001171646 | 1896 glucose inhibited division protein A         |
| CDR20291_3540 | 0 | 0           | 345 ribonuclease P protein component              |
| CDR20291_3541 | 0 | 0           | 135 50S ribosomal protein L34                     |
| CDR20291_3542 | 0 | 0           | 1320 chromosomal replication initiator protein    |
| CDR20291_3543 | 0 | 0           | 1209 DNA polymerase III                           |
| CDR20291_3544 | 0 | 0           | 207 putative RNA-binding mediating protein        |
| CDR20291_3545 | 0 | 0           | 1116 DNA replication and repair protein           |
| CDR20291_3546 | 0 | 0           | 1902 DNA gyrase subunit B                         |
| CDR20291_3547 | 0 | 0           | 1664 DNA gyrase subunit A                         |
