# Supplementary material for: High-Throughput Analysis of Gene Essentiality and Sporulation in Clostridium difficile
Source: PubMed Central journal article supplement (PMC4358009; doi:10.1128/mbio.02383-14), 2015-02-24
Supplement: mbo001152196st2.pdf [file mbo001152196st2.pdf]

| locus_tag     | function                                                                                 | logFC      | q.value     | 630 orthologue locus_tag |
|---------------|------------------------------------------------------------------------------------------|------------|-------------|--------------------------|
| CDR20291_0003 | seryl-tRNA synthetase                                                                    | -3.5327875 | 0.029669514 | CD630_00140              |
| CDR20291_0004 | putative cytosine/adenosine deaminase                                                    | -10.776685 | 3.18E-09    | CD630_00150              |
| CDR20291_0006 | DNA binding protein                                                                      | -8.8436605 | 2.08E-05    | CD630_00170              |
| CDR20291_0007 | recombination protein                                                                    | -9.6375654 | 3.48E-06    | CD630_00180              |
| CDR20291_0018 | putative membrane protein                                                                | -9.5763775 | 1.39E-06    | CD630_00290              |
| CDR20291_0020 | AraC-family transcriptional regulator                                                    | -2.8246041 | 1.31E-14    | CD630_00310              |
| CDR20291_0025 | acetoin:2,6-dichlorophenolindophenol oxidoreductase alpha subunit                        | -7.552354  | 4.01E-13    | CD630_00360              |
| CDR20291_0027 | E2 component of acetoin dehydrogenase enzyme system (dihydrolipoamide acetyltransferase) | -2.3049538 | 1.17E-07    | CD630_00380              |
| CDR20291_0028 | E3 component of acetoin dehydrogenase enzyme system (dihydrolipoyl dehydrogenase)        | -2.1159482 | 4.80E-15    | CD630_00390              |
| CDR20291_0039 | putative dual-specificity prolyl/cysteinyI-tRNA synthetase                               | -2.6848693 | 1.38E-10    | CD630_00500              |
| CDR20291_0050 | RNA polymerase sigma-H factor                                                            | -9.8902176 | 1.73E-39    | CD630_00570              |
| CDR20291_0051 | elongation factor TU                                                                     | -9.4206022 | 2.42E-06    |                          |
| CDR20291_0105 | aspartate aminotransferase                                                               | -7.6854612 | 1.10E-06    | CD630_01070              |
| CDR20291_0123 | stage II sporulation protein D                                                           | -8.9889938 | 1.70E-43    | CD630_01240              |
| CDR20291_0124 | putative cell wall endopeptidase                                                         | -6.6661979 | 2.34E-14    | CD630_01250              |
| CDR20291_0125 | stage III sporulation protein D                                                          | -10.122604 | 3.49E-07    | CD630_01260              |
| CDR20291_0128 | putative sporulation protein yyac                                                        | -3.8524059 | 1.95E-06    | CD630_01290              |
| CDR20291_0130 | putative membrane protein                                                                | -12.533059 | 3.32E-19    | CD630_01310              |
| CDR20291_0138 | glycosylasparaginase                                                                     | -2.0396298 | 9.27E-06    | CD630_01390              |
| CDR20291_0139 | putative peptidase                                                                       | -2.3220736 | 5.07E-13    | CD630_01400              |
| CDR20291_0140 | putative copper homeostasis protein                                                      | -3.0088435 | 0.002241391 | CD630_01410              |
| CDR20291_0160 | Radical SAM-family protein                                                               | -2.5008949 | 4.17E-07    | CD630_01620              |
| CDR20291_0162 | conserved hypothetical protein                                                           | -9.27897   | 6.74E-06    | CD630_01631              |
| CDR20291_0163 | uncharacterised protein                                                                  | -3.8878336 | 0.019823432 | CD630_01632              |
| CDR20291_0167 | putative sigma-54-dependent transcriptional regulator                                    | -2.3171071 | 3.40E-19    | CD630_01670              |
| CDR20291_0171 | putative redox-sensing transcriptional repressor                                         | -11.612673 | 6.33E-12    | CD630_01710              |
| CDR20291_0180 | NAD-specific glutamate dehydrogenase                                                     | -5.5543167 | 0.000141963 | CD630_01790              |
| CDR20291_0202 | putative chromate transporter                                                            | -4.4774238 | 0.007083376 | CD630_02010              |
| CDR20291_0203 | hypothetical protein                                                                     | -3.2413306 | 8.27E-21    |                          |
| CDR20291_0207 | PTS system, IIa component                                                                | -10.987475 | 1.68E-09    | CD630_02060              |
| CDR20291_0209 | PTS system, IIb component                                                                | -4.8681921 | 3.40E-10    | CD630_02080              |
| CDR20291_0210 | putative sugar-phosphate kinase                                                          | -4.6346951 | 1.11E-06    | CD630_02090              |
| CDR20291_0213 | uncharacterised protein                                                                  | -5.1695559 | 0.000569921 | CD630_02140              |
| CDR20291_0225 | dt dp-4-dehydrorhamnose 3,5-epimerase                                                    | -3.5262787 | 3.10E-25    |                          |
| CDR20291_0235 | carbon storage regulator                                                                 | -3.8064794 | 0.019541895 | CD630_02340              |
| CDR20291_0238 | flagellar cap protein                                                                    | -3.4598442 | 4.70E-20    | CD630_02370              |

|               |                                                                                                     |            |             |             |
|---------------|-----------------------------------------------------------------------------------------------------|------------|-------------|-------------|
| CDR20291_0250 | flagellar hook-basal body complex protein                                                           | -4.18161   | 9.51E-07    | CD630_02470 |
| CDR20291_0255 | flagellar protein                                                                                   | -2.0920942 | 0.000507373 | CD630_02520 |
| CDR20291_0265 | flagellar export protein                                                                            | -10.707733 | 1.15E-08    | CD630_02610 |
| CDR20291_0275 | putative flagellar motor switch protein                                                             | -3.7441718 | 9.82E-09    | CD630_02710 |
| CDR20291_0280 | AraC-family transcriptional regulator                                                               | -2.0325985 | 0.001720723 | CD630_02760 |
| CDR20291_0281 | conserved hypothetical protein                                                                      | -3.3154232 | 0.000445708 | CD630_02770 |
| CDR20291_0287 | PTS system, IIa component                                                                           | -3.965708  | 0.000981009 | CD630_02840 |
| CDR20291_0288 | PTS system, IIb component                                                                           | -3.961595  | 8.89E-05    | CD630_02850 |
| CDR20291_0289 | putative PTS system, IIa component                                                                  | -11.213343 | 1.62E-09    | CD630_02860 |
| CDR20291_0293 | conserved hypothetical protein                                                                      | -9.5009691 | 3.37E-06    | CD630_02900 |
| CDR20291_0294 | putative peptidase                                                                                  | -3.8543431 | 7.18E-35    | CD630_02910 |
| CDR20291_0296 | ABC transporter, ATP-binding protein                                                                | -2.5181185 | 0.001114619 | CD630_02930 |
| CDR20291_0304 | ribose ABC transporter, ATP-binding protein                                                         | -2.8925491 | 4.39E-15    | CD630_03010 |
| CDR20291_0316 | putative spore coat assembly asparagine-rich protein                                                | -2.4605236 | 0.001066619 | CD630_03110 |
| CDR20291_0317 | ArsR-family transcriptional regulator                                                               | -4.2447212 | 1.91E-08    | CD630_03120 |
| CDR20291_0318 | putative heavy-metal-transporting ATPase                                                            | -8.6173176 | 4.78E-45    | CD630_03130 |
| CDR20291_0339 | aldehyde-alcohol dehydrogenase [includes: alcohol dehydrogenase; acetaldehyde dehydrogenase [acetyl | -2.245568  | 6.87E-08    | CD630_03340 |
| CDR20291_0340 | conserved hypothetical protein                                                                      | -4.2165255 | 0.005322813 | CD630_03350 |
| CDR20291_0343 | two-component sensor histidine kinase                                                               | -3.3826227 | 1.27E-13    | CD630_03380 |
| CDR20291_0354 | putative hydrolase, HAD superfamily                                                                 | -5.8987366 | 5.42E-06    | CD630_03500 |
| CDR20291_0355 | conserved hypothetical protein                                                                      | -5.3140584 | 4.09E-51    | CD630_03510 |
| CDR20291_0358 | putative membrane protein                                                                           | -3.9678825 | 1.21E-09    | CD630_03541 |
| CDR20291_0360 | 6-phospho-beta-glucosidase                                                                          | -3.4523199 | 1.72E-13    | CD630_03890 |
| CDR20291_0361 | beta-glucoside bgl operon transcription antiterminator                                              | -2.7399926 | 0.004371175 | CD630_03900 |
| CDR20291_0366 | isocaprenoyl-CoA:2-hydroxyisocaproate CoA-transferase                                               | -10.894377 | 1.84E-09    | CD630_03950 |
| CDR20291_0367 | activator of 2-hydroxyisocaproyl-CoA dehydratase                                                    | -9.4585771 | 3.58E-06    | CD630_03960 |
| CDR20291_0370 | acyl-CoA dehydrogenase, short-chain specific                                                        | -7.8376217 | 2.96E-06    | CD630_03990 |
| CDR20291_0372 | electron transfer flavoprotein alpha-subunit                                                        | -9.4258895 | 2.21E-06    | CD630_04010 |
| CDR20291_0384 | putative arginine utilization sigma-54 dependent regulatory protein                                 | -2.0536671 | 2.72E-07    | CD630_04410 |
| CDR20291_0385 | putative oxidoreductase                                                                             | -2.3044917 | 1.06E-08    | CD630_04420 |
| CDR20291_0395 | AraC-family transcriptional regulator                                                               | -2.0349127 | 3.06E-16    | CD630_04540 |
| CDR20291_0400 | ABC transporter, ATP-binding protein                                                                | -3.8287439 | 1.12E-10    | CD630_04590 |
| CDR20291_0401 | ABC transporter, permease protein                                                                   | -2.9638898 | 3.09E-25    | CD630_04600 |
| CDR20291_0409 | putative hydrolase                                                                                  | -3.4001296 | 3.52E-05    | CD630_04670 |
| CDR20291_0418 | conserved hypothetical protein                                                                      | -2.3758893 | 1.52E-06    | CD630_04760 |
| CDR20291_0420 | putative lantibiotic ABC transporter, ATP-binding protein                                           | -11.517562 | 1.07E-11    | CD630_04780 |
| CDR20291_0427 | hypothetical protein                                                                                | -2.6739267 | 9.58E-08    |             |
| CDR20291_0429 | two-component response regulator                                                                    | -2.3497478 | 0.005517726 | CD630_04860 |
| CDR20291_0431 | quaternary ammonium compound-resistance protein                                                     | -2.4582461 | 0.036754988 | CD630_04880 |

|               |                                                           |            |             |             |
|---------------|-----------------------------------------------------------|------------|-------------|-------------|
| CDR20291_0433 | putative sugar-phosphate dehydrogenase                    | -11.877644 | 7.12E-12    | CD630_04900 |
| CDR20291_0434 | PTS system, IIa component                                 | -3.9786924 | 0.014223699 | CD630_04910 |
| CDR20291_0436 | PTS system, IIc component                                 | -2.3706814 | 7.33E-07    | CD630_04930 |
| CDR20291_0440 | cell surface protein (putative hemagglutinin/adhesin)     | -2.0011262 | 1.97E-09    | CD630_05140 |
| CDR20291_0456 | DeoR-family transcriptional regulator                     | -4.8211627 | 2.77E-16    | CD630_05310 |
| CDR20291_0475 | putative membrane protein                                 | -3.6525659 | 0.014081308 | CD630_05500 |
| CDR20291_0479 | signal peptidase I                                        | -6.9455614 | 1.08E-46    | CD630_05540 |
| CDR20291_0480 | signal peptidase I                                        | -10.244453 | 3.95E-104   | CD630_05550 |
| CDR20291_0481 | putative endonuclease                                     | -8.275233  | 0.000105538 | CD630_05560 |
| CDR20291_0485 | endonuclease IV                                           | -2.9105184 | 0.001161197 | CD630_05600 |
| CDR20291_0496 | putative sporulation protein                              | -3.3829355 | 8.76E-19    | CD630_05720 |
| CDR20291_0503 | two-component sensor histidine kinase                     | -4.3825355 | 1.87E-62    | CD630_05760 |
| CDR20291_0505 | putative efflux protein                                   | -2.3747999 | 1.93E-16    | CD630_05780 |
| CDR20291_0507 | NADP-dependent glyceraldehyde-3-phosphate dehydrogenase   | -4.5197454 | 5.95E-19    | CD630_05800 |
| CDR20291_0510 | putative signaling protein                                | -11.440107 | 3.46E-11    |             |
| CDR20291_0511 | uncharacterised protein                                   | -10.384372 | 4.34E-07    | CD630_05870 |
| CDR20291_0512 | uncharacterised protein                                   | -3.2730145 | 0.004463218 | CD630_05880 |
| CDR20291_0518 | conserved hypothetical protein                            | -2.4705221 | 0.007557645 | CD630_05930 |
| CDR20291_0524 | methylated-DNA--protein-cysteine methyltransferase 1      | -9.8522209 | 3.10E-07    | CD630_06010 |
| CDR20291_0535 | putative ABC transporter, permease protein                | -2.4530513 | 2.33E-22    | CD630_06120 |
| CDR20291_0536 | ABC transporter, ATP-binding protein                      | -10.81273  | 3.49E-09    | CD630_06130 |
| CDR20291_0545 | putative phage-related regulatory protein                 | -5.4406232 | 2.60E-06    | CD630_06240 |
| CDR20291_0547 | putative phage-related replicative helicase               | -2.4066459 | 3.41E-07    | CD630_06260 |
| CDR20291_0548 | putative phage positive regulator of late transcription   | -9.6475885 | 1.66E-21    | CD630_06270 |
| CDR20291_0549 | putative ferredoxin                                       | -9.2579602 | 1.06E-10    | CD630_06271 |
| CDR20291_0550 | putative membrane protein                                 | -4.4323737 | 0.004099397 | CD630_06280 |
| CDR20291_0556 | conserved hypothetical protein                            | -2.23484   | 5.40E-05    | CD630_06340 |
| CDR20291_0558 | putative radical SAM superfamily protein                  | -2.024176  | 1.69E-16    | CD630_06360 |
| CDR20291_0576 | putative ABC transporter, permease protein                | -3.967604  | 1.43E-29    | CD630_06540 |
| CDR20291_0579 | putative Na(+)/H(+) antiporter                            | -5.8869075 | 4.13E-05    | CD630_06570 |
| CDR20291_0586 | conserved hypothetical protein                            | -2.2779288 | 0.001945593 | CD630_06641 |
| CDR20291_0588 | putative lantibiotic ABC transporter, permease protein    | -2.8785248 | 0.000523814 | CD630_06650 |
| CDR20291_0590 | putative lantibiotic ABC transporter, ATP-binding protein | -11.348554 | 1.62E-10    | CD630_06670 |
| CDR20291_0598 | putative acetyltransferase                                | -4.2285491 | 0.003465589 | CD630_06750 |
| CDR20291_0599 | Extracytoplasmic function (ECF) anti-sigma factor rsiT    | -2.1100736 | 2.43E-05    | CD630_06760 |
| CDR20291_0601 | putative membrane protein                                 | -2.0592677 | 0.000706411 |             |
| CDR20291_0604 | hypothetical protein                                      | -2.9032562 | 1.89E-10    |             |
| CDR20291_0621 | putative exported peptidase                               | -2.3840707 | 1.49E-24    | CD630_06950 |
| CDR20291_0635 | putative DNA mismatch repair protein                      | -2.9337787 | 4.66E-11    | CD630_07090 |

|               |                                                                                               |            |             |             |
|---------------|-----------------------------------------------------------------------------------------------|------------|-------------|-------------|
| CDR20291_0640 | tetratricopeptide repeat protein                                                              | -4.0058679 | 4.40E-40    | CD630_07140 |
| CDR20291_0644 | putative carbon monoxide dehydrogenase accessory protein                                      | -4.9518879 | 3.82E-34    | CD630_07170 |
| CDR20291_0648 | uncharacterised protein                                                                       | -3.7408926 | 7.21E-09    | CD630_07210 |
| CDR20291_0654 | putative carbon monoxide dehydrogenase/acetyl-CoA synthase complex, methyltransferase subunit | -2.5357641 | 0.005104783 | CD630_07270 |
| CDR20291_0659 | putative radical SAM superfamily protein                                                      | -4.8643122 | 6.31E-34    | CD630_07320 |
| CDR20291_0670 | putative ethanolamine transporter                                                             | -10.444163 | 1.13E-07    | CD630_07420 |
| CDR20291_0688 | Ca <sup>2+</sup> /Na <sup>+</sup> antiporter                                                  | -6.2789128 | 1.01E-18    | CD630_07600 |
| CDR20291_0691 | glucitol operon activator protein                                                             | -3.4936973 | 0.000753796 | CD630_07630 |
| CDR20291_0693 | PTS system, glucitol/sorbitol-specific IIb component                                          | -3.0513559 | 7.06E-05    | CD630_07650 |
| CDR20291_0695 | PTS system, glucitol/sorbitol-specific IIa component                                          | -12.340831 | 8.05E-17    | CD630_07670 |
| CDR20291_0696 | sorbitol-6-phosphate 2-dehydrogenase                                                          | -10.267893 | 8.27E-07    | CD630_07680 |
| CDR20291_0699 | anti-sigma F factor antagonist                                                                | -10.91624  | 2.72E-09    | CD630_07700 |
| CDR20291_0700 | anti-sigma F factor                                                                           | -9.8278862 | 1.54E-06    | CD630_07710 |
| CDR20291_0701 | RNA polymerase sigma-F factor                                                                 | -5.7497318 | 5.00E-06    | CD630_07720 |
| CDR20291_0702 | stage V sporulation protein AC                                                                | -11.011033 | 1.61E-09    | CD630_07730 |
| CDR20291_0703 | stage V sporulation protein AD                                                                | -6.1919712 | 4.58E-08    | CD630_07740 |
| CDR20291_0704 | stage V sporulation protein AE                                                                | -14.172243 | 1.16E-73    | CD630_07750 |
| CDR20291_0707 | putative membrane protein                                                                     | -2.9351842 | 0.000318359 | CD630_07780 |
| CDR20291_0713 | putative exported protein                                                                     | -5.4153374 | 1.17E-21    | CD630_07820 |
| CDR20291_0714 | putative stage IV sporulation protein                                                         | -7.2816857 | 5.23E-18    | CD630_07830 |
| CDR20291_0723 | putative membrane protein                                                                     | -8.6911581 | 9.57E-09    | CD630_07920 |
| CDR20291_0724 | putative membrane protein                                                                     | -10.568752 | 3.65E-07    | CD630_07930 |
| CDR20291_0727 | LacI-family transcriptional regulator                                                         | -5.6292992 | 1.12E-05    | CD630_07960 |
| CDR20291_0730 | putative beta-alanine CoA-transferase                                                         | -11.689106 | 1.79E-11    | CD630_07990 |
| CDR20291_0732 | probable permease                                                                             | -10.575861 | 1.89E-08    | CD630_08010 |
| CDR20291_0737 | putative sigma-54-dependent transcriptional regulator                                         | -2.7232649 | 8.74E-14    | CD630_08060 |
| CDR20291_0740 | conserved hypothetical protein                                                                | -4.4229866 | 2.67E-15    | CD630_08090 |
| CDR20291_0746 | probable transporter                                                                          | -3.1079811 | 1.05E-36    | CD630_08150 |
| CDR20291_0748 | putative 6-phospho-beta-glucosidase                                                           | -8.3830244 | 1.17E-16    | CD630_08180 |
| CDR20291_0751 | two-component sensor histidine kinase                                                         | -3.8148414 | 0.000376202 | CD630_08210 |
| CDR20291_0753 | putative lantibiotic ABC transporter, permease protein                                        | -9.9365727 | 2.34E-07    | CD630_08230 |
| CDR20291_0755 | rubrerythrin                                                                                  | -2.5824364 | 2.98E-05    | CD630_08250 |
| CDR20291_0762 | putative homocitrate/2-isopropylmalate synthase                                               | -4.4329255 | 9.64E-43    | CD630_08320 |
| CDR20291_0763 | putative aconitase/3-isopropylmalate dehydratase                                              | -5.8525878 | 1.52E-19    | CD630_08330 |
| CDR20291_0764 | putative isocitrate/3-isopropylmalate dehydrogenase                                           | -4.8619345 | 1.31E-16    | CD630_08340 |
| CDR20291_0775 | putative nuclease                                                                             | -2.599153  | 0.005298735 | CD630_08450 |
| CDR20291_0777 | conserved hypothetical protein                                                                | -2.8564319 | 0.000224539 | CD630_08470 |
| CDR20291_0778 | conserved hypothetical protein                                                                | -2.7445102 | 1.43E-11    | CD630_08480 |
| CDR20291_0781 | putative membrane protein                                                                     | -2.2539225 | 5.16E-06    | CD630_08510 |

|               |                                                                      |            |             |             |
|---------------|----------------------------------------------------------------------|------------|-------------|-------------|
| CDR20291_0789 | conserved hypothetical protein                                       | -11.417522 | 2.58E-11    | CD630_08600 |
| CDR20291_0790 | PTS system, IIb component                                            | -12.77138  | 1.85E-24    | CD630_08610 |
| CDR20291_0803 | ABC transporter, ATP-binding protein                                 | -3.2220371 | 0.006482613 | CD630_08740 |
| CDR20291_0804 | ABC transporter, permease protein                                    | -4.0409232 | 0.011720686 | CD630_08750 |
| CDR20291_0806 | ABC transporter, ATP-binding protein                                 | -5.6375353 | 7.76E-05    | CD630_08770 |
| CDR20291_0814 | glycogen synthase                                                    | -2.7624165 | 1.23E-10    | CD630_08840 |
| CDR20291_0832 | putative cation efflux rotein                                        | -2.9929115 | 0.002211243 | CD630_09020 |
| CDR20291_0839 | putative 30S ribosomal protein S1                                    | -2.7735411 | 8.22E-08    | CD630_09860 |
| CDR20291_0854 | ABC transporter, ATP-binding protein                                 | -2.0793452 | 0.007062989 | CD630_10010 |
| CDR20291_0855 | putative regulatory protein                                          | -2.8886507 | 2.96E-06    | CD630_10020 |
| CDR20291_0859 | conserved hypothetical protein                                       | -10.32878  | 2.48E-07    | CD630_10070 |
| CDR20291_0866 | N-acetylglucosamine-6-phosphate deacetylase                          | -7.3565468 | 4.95E-08    | CD630_10100 |
| CDR20291_0867 | glucosamine-6-phosphate deaminase                                    | -13.459828 | 3.43E-42    | CD630_10110 |
| CDR20291_0879 | putative transcriptional regulator                                   | -2.8854237 | 1.17E-08    | CD630_10230 |
| CDR20291_0880 | spermidine/putrescine ABC transporter, ATP-binding protein           | -6.4304472 | 3.93E-56    | CD630_10240 |
| CDR20291_0881 | spermidine/putrescine ABC transporter, permease protein              | -6.3968073 | 1.48E-34    | CD630_10250 |
| CDR20291_0882 | putative spermidine/putrescine ABC transporter, permease protein     | -3.4842322 | 2.74E-05    | CD630_10260 |
| CDR20291_0883 | spermidine/putrescine ABC transporter, substrate-binding lipoprotein | -11.713274 | 4.29E-62    | CD630_10270 |
| CDR20291_0895 | conserved hypothetical protein                                       | -5.5611369 | 4.89E-19    | CD630_10390 |
| CDR20291_0896 | ATP-dependent nuclease subunit B                                     | -10.848096 | 1.05E-08    | CD630_10400 |
| CDR20291_0897 | ATP-dependent nuclease subunit A                                     | -5.3153441 | 0.000545585 | CD630_10410 |
| CDR20291_0898 | nuclease subunit D                                                   | -2.009233  | 1.20E-10    | CD630_10420 |
| CDR20291_0918 | acyl carrier protein                                                 | -14.373005 | 3.28E-82    | CD630_10620 |
| CDR20291_0920 | uncharacterised protein                                              | -12.258843 | 1.13E-15    | CD630_10631 |
| CDR20291_0922 | conserved hypothetical protein                                       | -9.3096318 | 4.06E-06    | CD630_10633 |
| CDR20291_0923 | LacI-family transcriptional regulator (catabolite control protein)   | -12.496422 | 5.50E-173   | CD630_10640 |
| CDR20291_0924 | uncharacterised protein                                              | -9.8139025 | 7.80E-06    | CD630_10650 |
| CDR20291_0926 | uncharacterised protein                                              | -3.0771877 | 5.10E-07    | CD630_10670 |
| CDR20291_0927 | putative polysaccharide biosynthesis/sporulation protein             | -2.7564596 | 4.16E-14    | CD630_10680 |
| CDR20291_0930 | uncharacterised protein, UPF0291 protein family                      | -3.3788815 | 5.93E-05    | CD630_10710 |
| CDR20291_0935 | PTS system, IIb component                                            | -4.2486006 | 0.001229029 | CD630_10760 |
| CDR20291_0936 | PTS system, IIc component                                            | -2.37709   | 0.021855143 | CD630_10770 |
| CDR20291_0938 | LysR-family transcriptional regulator                                | -4.9331953 | 0.00292519  | CD630_10790 |
| CDR20291_0948 | two-component response regulator                                     | -2.7871159 | 4.38E-09    | CD630_10890 |
| CDR20291_0950 | putative lipoprotein                                                 | -9.3332255 | 8.27E-06    | CD630_11190 |
| CDR20291_0964 | DNA polymerase I                                                     | -3.3857694 | 9.22E-11    | CD630_11280 |
| CDR20291_0966 | putative transglycosylase                                            | -10.585413 | 1.24E-08    | CD630_11300 |
| CDR20291_0972 | putative membrane protein                                            | -3.5425097 | 6.87E-22    | CD630_11360 |
| CDR20291_0973 | electron transport complex protein                                   | -11.442678 | 5.76E-11    | CD630_11370 |

|                |                                                                      |            |             |             |
|----------------|----------------------------------------------------------------------|------------|-------------|-------------|
| CDR20291_0974  | electron transport complex protein                                   | -10.13791  | 1.19E-07    | CD630_11380 |
| CDR20291_0975  | electron transport complex protein                                   | -8.8654105 | 2.19E-05    | CD630_11390 |
| CDR20291_0976  | electron transport complex protein                                   | -10.629614 | 8.14E-09    | CD630_11400 |
| CDR20291_0977  | electron transport complex protein                                   | -9.4717932 | 1.93E-06    | CD630_11410 |
| CDR20291_0978  | electron transport complex protein                                   | -2.5560561 | 0.026519833 | CD630_11420 |
| CDR20291_0997  | ribonuclease g                                                       | -4.5765823 | 2.21E-22    | CD630_11600 |
| CDR20291_1009  | electron transfer flavoprotein alpha-subunit                         | -2.3348615 | 2.16E-07    | CD630_11720 |
| CDR20291_1011  | conserved hypothetical protein, DUF795 family,UPF0348 family         | -2.9237025 | 4.53E-19    | CD630_11740 |
| CDR20291_1012  | acetate kinase                                                       | -3.7688823 | 0.022740337 | CD630_11750 |
| CDR20291_1013  | conserved hypothetical protein, DUF177 family                        | -10.602775 | 2.03E-06    | CD630_11760 |
| CDR20291_1028  | putative acetyltransferase                                           | -3.5492151 | 0.033976282 | CD630_11900 |
| CDR20291_1029  | putative fructose-1,6-bisphosphatase                                 | -4.2417183 | 0.010568657 | CD630_11910 |
| CDR20291_1030  | stage III sporulation protein AA                                     | -12.545707 | 6.93E-20    | CD630_11920 |
| CDR20291_1031  | stage III sporulation protein AB                                     | -10.928114 | 1.59E-09    | CD630_11930 |
| CDR20291_1033  | stage III sporulation protein AD                                     | -10.059333 | 1.41E-07    | CD630_11950 |
| CDR20291_1034  | stage III sporulation-related protein                                | -13.133801 | 5.73E-34    | CD630_11960 |
| CDR20291_1035  | putative stage III sporulation protein AF                            | -5.4877456 | 0.00025202  | CD630_11970 |
| CDR20291_1036  | stage iii sporulation protein ag                                     | -10.126936 | 5.31E-06    | CD630_11980 |
| CDR20291_1042  | exodeoxyribonuclease VII small subunit                               | -9.5476272 | 4.21E-06    | CD630_12040 |
| CDR20291_1043  | geranyltranstransferase                                              | -11.0791   | 1.06E-08    | CD630_12050 |
| CDR20291_1045  | 1-deoxy-D-xylulose 5-phosphate synthase                              | -5.1678553 | 0.001156434 | CD630_12070 |
| CDR20291_1046  | putative RNA methyltransferase                                       | -2.4974994 | 0.012279149 | CD630_12080 |
| CDR20291_1051  | stage IV sporulation protein B                                       | -4.0728792 | 1.47E-10    | CD630_12130 |
| CDR20291_1052  | stage 0 sporulation protein A                                        | -10.527673 | 7.60E-23    | CD630_12140 |
| CDR20291_1067  | putative penicillin-binding protein                                  | -4.7764618 | 2.75E-35    | CD630_12290 |
| CDR20291_1067A | hypothetical protein                                                 | -3.9620026 | 5.97E-05    |             |
| CDR20291_1068  | site-specific recombinase                                            | -3.7990802 | 3.72E-17    | CD630_12310 |
| CDR20291_1072A | putative phage regulator                                             | -4.4199472 | 0.003857597 | CD630_12333 |
| CDR20291_1073  | putative phage protein                                               | -4.4480779 | 0.005837398 | CD630_12340 |
| CDR20291_1075  | putative exported protein                                            | -4.5361861 | 0.004449344 |             |
| CDR20291_1080  | putative phage-related DNA-directed RNA polymerase 7 kDa polypeptide | -8.9614809 | 1.24E-05    | CD630_12401 |
| CDR20291_1080A | hypothetical protein                                                 | -6.0625102 | 1.43E-05    |             |
| CDR20291_1089  | chromosome partition protein                                         | -3.5088822 | 0.000165635 | CD630_12500 |
| CDR20291_1099  | branched-chain amino acid transport system carrier protein           | -9.6166083 | 1.06E-11    | CD630_12590 |
| CDR20291_1114  | DNA topoisomerase I                                                  | -5.6042468 | 0.00011199  | CD630_12740 |
| CDR20291_1118  | RRF2-family transcriptional regulator                                | -9.6321584 | 2.09E-06    | CD630_12780 |
| CDR20291_1125  | putative holliday junction resolvase                                 | -8.4085545 | 0.000148383 | CD630_12850 |
| CDR20291_1127  | ferric uptake regulation protein                                     | -10.65438  | 9.36E-08    | CD630_12870 |
| CDR20291_1129  | metallo beta-lactamase superfamily protein                           | -10.733695 | 7.33E-09    | CD630_12890 |

|                |                                                                  |            |             |             |
|----------------|------------------------------------------------------------------|------------|-------------|-------------|
| CDR20291_1131  | D-alanyl-D-alanine carboxypeptidase (penicillin-binding protein) | -5.2012633 | 1.26E-06    | CD630_12910 |
| CDR20291_1133  | AraC-family transcriptional regulator                            | -11.151509 | 3.93E-10    | CD630_12930 |
| CDR20291_1135  | segregation and condensation protein A                           | -4.8114308 | 0.000484848 | CD630_12950 |
| CDR20291_1136  | segregation and condensation protein B                           | -5.1590839 | 9.99E-10    | CD630_12960 |
| CDR20291_1138  | putative sporulation protein                                     | -6.0828947 | 2.23E-05    | CD630_12980 |
| CDR20291_1141  | putative membrane protein                                        | -2.7021621 | 2.99E-19    | CD630_13010 |
| CDR20291_1142  | conserved hypothetical protein                                   | -9.7711616 | 5.09E-07    | CD630_13011 |
| CDR20291_1152  | ribosome-binding factor A                                        | -10.143319 | 1.87E-07    | CD630_13100 |
| CDR20291_1160  | putative polysaccharide deacetylase                              | -4.3418416 | 0.001730979 | CD630_13190 |
| CDR20291_1161  | putative peptidase                                               | -6.1985275 | 3.94E-08    | CD630_13200 |
| CDR20291_1162  | putative sporulation protein                                     | -9.0138663 | 1.67E-05    | CD630_13210 |
| CDR20291_1165  | putative DNA translocase                                         | -7.4809908 | 2.18E-16    | CD630_13240 |
| CDR20291_1166  | putative ATP/GTP binding protein                                 | -10.994947 | 1.22E-08    | CD630_13250 |
| CDR20291_1167  | radical SAM-superfamily protein                                  | -11.174811 | 1.36E-08    | CD630_13260 |
| CDR20291_1169  | RecA protein (recombinase A)                                     | -9.9164617 | 2.49E-07    | CD630_13280 |
| CDR20291_1171  | putative DNA helicase, UvrD/REP type                             | -8.685407  | 2.59E-05    | CD630_13300 |
| CDR20291_1173  | undecaprenyl-diphosphatase                                       | -4.6672712 | 0.000589956 | CD630_13320 |
| CDR20291_1185  | glutamine synthetase                                             | -2.3047343 | 8.93E-20    | CD630_13430 |
| CDR20291_1191  | putative lantibiotic ABC transporter, ATP-binding protein        | -2.8599954 | 5.11E-07    | CD630_13490 |
| CDR20291_1192  | putative lantibiotic ABC transporter, permease protein           | -3.7262661 | 0.002005453 | CD630_13500 |
| CDR20291_1201  | putative phage-related protein                                   | -2.1208906 | 0.000943335 | CD630_13590 |
| CDR20291_1212  | putative phage cell wall hydrolase                               | -3.1970518 | 0.00048663  | CD630_13680 |
| CDR20291_1219  | putative phage-related protein                                   | -2.4684269 | 0.002704431 | CD630_13750 |
| CDR20291_1224  | conserved hypothetical protein                                   | -2.5384784 | 0.015222514 | CD630_13782 |
| CDR20291_1230  | putative lamB-like protein, UPF0271 family                       | -2.6023898 | 4.81E-11    | CD630_13840 |
| CDR20291_1233  | putative allophanate hydrolase subunit 2                         | -2.9179488 | 2.56E-12    | CD630_13870 |
| CDR20291_1235  | putative chloromuconate cycloisomerase                           | -3.1429804 | 0.001522738 | CD630_13890 |
| CDR20291_1236  | putative membrane protein                                        | -4.2076622 | 3.96E-07    | CD630_13900 |
| CDR20291_1238  | putative endoribonuclease                                        | -8.8129506 | 2.05E-05    | CD630_13920 |
| CDR20291_1239  | putative membrane protein                                        | -2.0847165 | 2.21E-10    | CD630_13930 |
| CDR20291_1260  | putative membrane protein                                        | -6.8933878 | 3.83E-07    | CD630_14130 |
| CDR20291_1263  | putative membrane protein                                        | -10.539933 | 6.14E-08    | CD630_14160 |
| CDR20291_1265A | hypothetical protein                                             | -10.215038 | 9.39E-08    |             |
| CDR20291_1271  | conserved hypothetical protein                                   | -3.7826015 | 0.020236304 | CD630_14240 |
| CDR20291_1274  | putative transcriptional regulator                               | -2.2292868 | 1.51E-10    | CD630_14280 |
| CDR20291_1275  | conserved hypothetical protein                                   | -9.6150023 | 1.09E-06    | CD630_14281 |
| CDR20291_1276  | putative acyl-CoA N-acyltransferase                              | -4.5966572 | 0.000225005 | CD630_14290 |
| CDR20291_1281  | putative ribonuclease                                            | -4.8519151 | 0.001436812 | CD630_14320 |
| CDR20291_1297  | conserved hypothetical protein                                   | -7.8020893 | 3.54E-11    | CD630_14480 |

|                |                                                                                                    |            |             |             |
|----------------|----------------------------------------------------------------------------------------------------|------------|-------------|-------------|
| CDR20291_1305  | putative SAM-dependent methyltransferase                                                           | -3.3898367 | 0.003791221 | CD630_14560 |
| CDR20291_1312  | putative membrane protein                                                                          | -10.341952 | 5.10E-08    | CD630_14630 |
| CDR20291_1314  | two-component sensor kinase                                                                        | -2.0619394 | 4.93E-06    | CD630_14650 |
| CDR20291_1319  | putative phage shock protein                                                                       | -5.0064385 | 0.001229068 | CD630_14700 |
| CDR20291_1328  | ferrous iron transport protein B                                                                   | -2.4764176 | 3.34E-11    | CD630_14790 |
| CDR20291_1332  | putative aliphatic sulfonates ABC transporter, ATP-binding protein                                 | -2.5936537 | 0.009474012 | CD630_14830 |
| CDR20291_1336  | conserved hypothetical protein                                                                     | -5.5109562 | 0.000168746 | CD630_14870 |
| CDR20291_1352  | ABC transporter, ATP-binding protein                                                               | -10.652173 | 7.04E-09    | CD630_15040 |
| CDR20291_1368  | putative acetyltransferase                                                                         | -9.8037479 | 4.06E-07    | CD630_15190 |
| CDR20291_1373  | putative rubrerythrin                                                                              | -13.376506 | 1.90E-40    | CD630_15240 |
| CDR20291_1378  | putative ABC transporter, permease protein                                                         | -3.6555434 | 8.93E-06    | CD630_15290 |
| CDR20291_1385  | putative dehydrogenase, electron transfer subunit                                                  | -10.785405 | 4.72E-09    | CD630_15360 |
| CDR20291_1386  | putative glutamate synthase [NADPH] small chain                                                    | -9.0529749 | 9.28E-10    | CD630_15370 |
| CDR20291_1395  | putative hemolysin-like membrane protein                                                           | -2.0905115 | 0.000798475 | CD630_15460 |
| CDR20291_1396  | putative ATP phosphoribosyltransferase regulatory subunit                                          | -3.5929571 | 0.000106005 | CD630_15470 |
| CDR20291_1399  | imidazoleglycerol-phosphate dehydratase                                                            | -4.0958001 | 1.20E-06    | CD630_15500 |
| CDR20291_1401  | putative 1-(5-phosphoribosyl)-5-[(5-phosphoribosylamino)methylidene amino] imidazole-4-carboxamide | -2.3890195 | 2.02E-07    | CD630_15520 |
| CDR20291_1402  | putative imidazole glycerol phosphate synthase subunit                                             | -4.2302665 | 0.00948113  | CD630_15530 |
| CDR20291_1412  | conserved hypothetical protein                                                                     | -9.5822898 | 1.11E-06    | CD630_15640 |
| CDR20291_1415  | prophage lambda04, site-specific recombinase, phage integrase family                               | -4.0929487 | 7.76E-15    |             |
| CDR20291_1418C | hypothetical protein                                                                               | -11.105842 | 1.57E-09    |             |
| CDR20291_1421A | hypothetical protein                                                                               | -11.649698 | 3.52E-11    |             |
| CDR20291_1422  | hypothetical protein                                                                               | -11.873125 | 7.37E-13    |             |
| CDR20291_1423  | hypothetical protein                                                                               | -5.9236885 | 3.48E-05    |             |
| CDR20291_1424  | dna-directed dna polymerase i                                                                      | -11.841823 | 2.57E-12    |             |
| CDR20291_1425  | putative virulence-associated protein e                                                            | -4.6430889 | 1.88E-24    |             |
| CDR20291_1427  | hypothetical protein                                                                               | -4.0505433 | 2.24E-05    |             |
| CDR20291_1429  | hypothetical protein                                                                               | -2.4112183 | 5.90E-16    |             |
| CDR20291_1433  | phage portal protein                                                                               | -6.1337501 | 1.05E-05    | CD630_29210 |
| CDR20291_1434A | hypothetical protein                                                                               | -10.76389  | 3.30E-09    |             |
| CDR20291_1437  | hypothetical phage protein                                                                         | -11.680054 | 4.57E-12    | CD630_09500 |
| CDR20291_1438  | phage protein                                                                                      | -10.372478 | 1.39E-07    | CD630_09510 |
| CDR20291_1441  | phage protein                                                                                      | -11.695714 | 5.91E-12    | CD630_29100 |
| CDR20291_1442  | phage protein                                                                                      | -9.9638981 | 3.96E-07    | CD630_09550 |
| CDR20291_1444  | phage protein                                                                                      | -11.340134 | 8.21E-11    | CD630_09560 |
| CDR20291_1452  | phage protein                                                                                      | -8.8173502 | 3.61E-05    | CD630_09620 |
| CDR20291_1453  | phage protein                                                                                      | -8.6472871 | 5.96E-05    | CD630_29010 |
| CDR20291_1456  | putative phage tail fiber protein                                                                  | -10.696885 | 4.90E-08    | CD630_09660 |
| CDR20291_1463  | n-acetylmuramoyl-l-alanine amidase (cell wall hydrolase)                                           | -2.6541347 | 0.003852484 |             |



|                |                                                                                                 |            |             |             |
|----------------|-------------------------------------------------------------------------------------------------|------------|-------------|-------------|
| CDR20291_1475  | putative membrane-associated ribonuclease                                                       | -2.3279359 | 9.54E-05    | CD630_15780 |
| CDR20291_1478  | uncharacterised protein                                                                         | -6.7815721 | 6.85E-05    | CD630_15810 |
| CDR20291_1480  | conserved hypothetical protein                                                                  | -2.7892519 | 0.003155554 | CD630_15830 |
| CDR20291_1487  | putative ribose ABC transporter, substrate-binding lipoprotein                                  | -5.2613524 | 0.000190625 | CD630_15890 |
| CDR20291_1491  | potassium-transporting ATPase C chain                                                           | -4.6448953 | 0.003149919 | CD630_15930 |
| CDR20291_1492  | putative O-acetylserine sulfhydrylase                                                           | -10.030648 | 2.16E-14    | CD630_15940 |
| CDR20291_1493  | serine acetyltransferase                                                                        | -9.8855702 | 8.66E-07    | CD630_15950 |
| CDR20291_1496  | putative endonuclease                                                                           | -2.7132229 | 8.96E-06    | CD630_15980 |
| CDR20291_1497  | putative phosphomethylpyrimidine kinase                                                         | -9.4673827 | 1.62E-10    | CD630_15990 |
| CDR20291_1502  | ABC transporter, ATP-binding protein                                                            | -9.5993257 | 1.09E-31    | CD630_16040 |
| CDR20291_1503  | putative transcriptional regulator                                                              | -8.5129046 | 4.59E-05    | CD630_16050 |
| CDR20291_1509  | putative exported protein                                                                       | -2.4173316 | 4.53E-12    | CD630_16110 |
| CDR20291_1524  | putative D-alanine:D-alanine ligase (putative vancomycin/teicoplanin A-type resistance protein) | -10.188924 | 1.37E-07    | CD630_16260 |
| CDR20291_1529  | putative superoxide dismutase [Mn]                                                              | -6.7712534 | 3.45E-07    | CD630_16310 |
| CDR20291_1545  | putative iron compound ABC transporter, permease protein                                        | -12.134901 | 3.55E-14    | CD630_16470 |
| CDR20291_1552  | putative lipoate-protein ligase                                                                 | -3.4271595 | 5.16E-05    | CD630_16540 |
| CDR20291_1558  | uncharacterised protein                                                                         | -5.0189713 | 0.00094661  | CD630_16600 |
| CDR20291_1560A | hypothetical protein                                                                            | -3.5364399 | 0.042835382 | CD630_16632 |
| CDR20291_1565  | putative membrane protein                                                                       | -3.9508973 | 5.43E-12    | CD630_16680 |
| CDR20291_1569  | two-component sensor histidine kinase                                                           | -2.0295037 | 1.67E-10    | CD630_16720 |
| CDR20291_1575  | putative membrane protein                                                                       | -10.356629 | 5.95E-08    | CD630_16780 |
| CDR20291_1576  | conserved hypothetical protein                                                                  | -10.42753  | 2.83E-08    | CD630_16781 |
| CDR20291_1578  | putative FMN-binding exported protein                                                           | -2.6224225 | 1.21E-06    | CD630_16800 |
| CDR20291_1586  | two-component response regulator                                                                | -4.3177221 | 5.06E-22    | CD630_16880 |
| CDR20291_1606  | putative C4-dicarboxylate anaerobic carrier                                                     | -3.3168302 | 0.009314469 | CD630_17070 |
| CDR20291_1615  | probable permease                                                                               | -2.9472889 | 0.001829534 | CD630_17160 |
| CDR20291_1621  | conserved hypothetical protein                                                                  | -2.7069794 | 0.013995762 | CD630_17240 |
| CDR20291_1622  | AraC-family transcriptional regulator                                                           | -2.2587423 | 2.41E-06    | CD630_17250 |
| CDR20291_1626A | conserved hypothetical protein                                                                  | -2.0820686 | 0.013777316 | CD630_17292 |
| CDR20291_1632  | putative hydrolase                                                                              | -3.6675493 | 0.000231914 | CD630_17350 |
| CDR20291_1638A | hypothetical protein                                                                            | -3.8583684 | 0.018924941 |             |
| CDR20291_1645A | conserved hypothetical protein                                                                  | -4.4376742 | 0.005198032 | CD630_17511 |
| CDR20291_1647  | ABC transporter, ATP-binding protein                                                            | -9.7070872 | 8.74E-07    | CD630_17530 |
| CDR20291_1648  | putative ABC transporter, permease protein                                                      | -3.38361   | 0.000640915 | CD630_17540 |
| CDR20291_1649  | putative ABC transporter, permease protein                                                      | -3.4847507 | 2.25E-06    | CD630_17550 |
| CDR20291_1662  | glyceraldehyde-3-phosphate dehydrogenase 1                                                      | -12.425267 | 4.04E-18    | CD630_17670 |
| CDR20291_1669  | amino acid ABC transporter, substrate-binding protein                                           | -4.082594  | 0.01184514  | CD630_17740 |
| CDR20291_1671  | amino acid ABC transporter, ATP-binding protein                                                 | -3.3703004 | 0.00035721  | CD630_17760 |
| CDR20291_1674  | conserved hypothetical protein                                                                  | -10.928471 | 5.32E-09    | CD630_17790 |

|               |                                                                       |            |             |             |
|---------------|-----------------------------------------------------------------------|------------|-------------|-------------|
| CDR20291_1680 | argininosuccinate synthase                                            | -3.4458724 | 1.11E-22    | CD630_17850 |
| CDR20291_1683 | putative membrane protein                                             | -9.1299109 | 4.09E-05    | CD630_17880 |
| CDR20291_1684 | putative membrane protein                                             | -3.3319461 | 0.000531965 | CD630_17890 |
| CDR20291_1688 | putative membrane protein                                             | -10.718819 | 4.59E-09    | CD630_17930 |
| CDR20291_1690 | conserved hypothetical protein                                        | -10.932953 | 3.14E-09    | CD630_17950 |
| CDR20291_1701 | putative fructokinase                                                 | -2.6070016 | 3.89E-08    | CD630_18060 |
| CDR20291_1707 | putative two-component system response regulator (partial)            | -3.4106667 | 0.001949804 | CD630_18120 |
| CDR20291_1710 | conserved hypothetical protein                                        | -4.2619905 | 8.18E-06    | CD630_18150 |
| CDR20291_1715 | adenine deaminase                                                     | -2.3565943 | 2.49E-06    | CD630_18200 |
| CDR20291_1717 | conserved hypothetical protein, UPF0246 family                        | -3.7986282 | 1.08E-54    | CD630_18230 |
| CDR20291_1729 | 3-phosphoshikimate 1-carboxyvinyltransferase                          | -4.1256249 | 2.03E-31    | CD630_18340 |
| CDR20291_1730 | chorismate synthase (5-enolpyruvylshikimate-3-phosphate phospholyase) | -3.6545564 | 2.72E-12    | CD630_18350 |
| CDR20291_1731 | P-protein [includes: chorismate mutase and prephenate dehydratase]    | -2.3917393 | 1.05E-08    | CD630_18360 |
| CDR20291_1732 | shikimate dehydrogenase                                               | -3.5549037 | 1.96E-06    | CD630_18370 |
| CDR20291_1733 | shikimate kinase                                                      | -3.3028453 | 0.000492854 | CD630_18380 |
| CDR20291_1740 | putative rna methyltransferase                                        | -10.617979 | 2.48E-08    | CD630_18441 |
| CDR20291_1742 | putative conjugative transposon protein                               | -10.473184 | 5.32E-08    |             |
| CDR20291_1752 | putative lantibiotic abc transporter, permease protein                | -9.490417  | 2.12E-06    |             |
| CDR20291_1763 | replicative dna helicase                                              | -8.6325145 | 3.65E-05    |             |
| CDR20291_1776 | putative conjugal transfer protein                                    | -10.166418 | 2.40E-07    |             |
| CDR20291_1777 | hypothetical protein                                                  | -9.7034527 | 4.44E-06    |             |
| CDR20291_1791 | conserved hypothetical protein                                        | -10.834978 | 2.00E-09    |             |
| CDR20291_1800 | putative conjugative transposon mobilization protein                  | -5.7792859 | 9.72E-05    |             |
| CDR20291_1801 | putative exported protein                                             | -13.299252 | 1.29E-36    |             |
| CDR20291_1810 | uncharacterised protein                                               | -10.027069 | 1.51E-07    | CD630_18800 |
| CDR20291_1811 | Fragment of ABC-type transport system,substrate-binding protein       | -3.1963323 | 2.77E-05    | CD630_18910 |
| CDR20291_1813 | putative regulatory protein                                           | -6.4931452 | 1.86E-06    | CD630_18930 |
| CDR20291_1824 | ABC transporter, permease protein                                     | -11.062266 | 9.05E-09    | CD630_19040 |
| CDR20291_1834 | putative ethanolamine/propanediol ammonia-lyase heavy chain           | -2.2511782 | 0.02419512  | CD630_19130 |
| CDR20291_1836 | putative ethanolamine/propanediol utilization protein                 | -8.7303983 | 2.68E-05    | CD630_19150 |
| CDR20291_1843 | putative ethanolamine/propanediol utilization protein                 | -3.3499871 | 0.036263551 | CD630_19220 |
| CDR20291_1844 | putative ethanolamine/propanediol utilization protein                 | -10.374654 | 3.87E-08    | CD630_19230 |
| CDR20291_1846 | putative ethanolamine/propanediol utilization protein                 | -9.6101282 | 1.08E-06    | CD630_19250 |
| CDR20291_1850 | putative aminotransferase                                             | -2.2535472 | 3.03E-05    |             |
| CDR20291_1851 | putative membrane protein                                             | -5.1365417 | 6.87E-30    | CD630_19280 |
| CDR20291_1864 | uncharacterised protein                                               | -6.3161014 | 5.05E-07    | CD630_19410 |
| CDR20291_1866 | uncharacterised protein                                               | -2.0887477 | 0.020915882 | CD630_19430 |
| CDR20291_1868 | putative glyoxalase                                                   | -3.3869105 | 3.09E-05    | CD630_19450 |
| CDR20291_1872 | putative two-component sensor histidine kinase                        | -2.1801402 | 9.51E-06    | CD630_19490 |

|                |                                                                                                             |            |             |             |
|----------------|-------------------------------------------------------------------------------------------------------------|------------|-------------|-------------|
| CDR20291_1878  | ABC transporter, ATP-binding protein                                                                        | -4.3799616 | 0.007351074 | CD630_19550 |
| CDR20291_1880  | two-component response regulator                                                                            | -2.0640702 | 0.026515321 | CD630_19570 |
| CDR20291_1888  | putative membrane protein                                                                                   | -4.5371933 | 2.26E-08    | CD630_19650 |
| CDR20291_1889  | putative acyl-CoA thioesterase                                                                              | -12.347925 | 2.85E-16    | CD630_19660 |
| CDR20291_1891  | putative membrane protein                                                                                   | -2.0885502 | 3.98E-13    | CD630_19680 |
| CDR20291_1894  | putative protein, Sir2 family; putative silencing, chromosome stability or ageing; putative ADP ribosyltran | -2.2369375 | 4.38E-06    | CD630_19710 |
| CDR20291_1898  | tRNA delta(2)-isopentenylpyrophosphate transferase                                                          | -6.9093233 | 1.70E-07    | CD630_19750 |
| CDR20291_1907  | Fragment of putative phenazine biosynthesis protein                                                         | -2.4903042 | 0.003317094 | CD630_19820 |
| CDR20291_1910  | putative radical sam protein                                                                                | -2.0854042 | 5.11E-19    | CD630_19860 |
| CDR20291_1911  | cell surface protein                                                                                        | -5.2165166 | 0.000445038 | CD630_19870 |
| CDR20291_1912  | putative tryptophan transport protein                                                                       | -5.2366328 | 0.000437028 | CD630_19880 |
| CDR20291_1913  | putative membrane protein                                                                                   | -11.006895 | 1.51E-09    | CD630_19890 |
| CDR20291_1921  | putative membrane protein                                                                                   | -3.0238729 | 1.22E-12    | CD630_19950 |
| CDR20291_1929  | conserved hypothetical protein                                                                              | -12.014734 | 1.61E-13    | CD630_20160 |
| CDR20291_1931  | AraC-family transcriptional regulator                                                                       | -2.6925282 | 6.25E-10    | CD630_20180 |
| CDR20291_1934  | conserved hypothetical protein                                                                              | -3.4789462 | 3.55E-16    | CD630_20210 |
| CDR20291_1943  | ornithine carbamoyltransferase                                                                              | -9.977246  | 4.16E-07    | CD630_20300 |
| CDR20291_1945  | acetylglutamate kinase                                                                                      | -4.4900742 | 0.000366958 | CD630_20320 |
| CDR20291_1947  | N-acetyl-gamma-glutamyl-phosphate reductase                                                                 | -3.784434  | 0.02482962  | CD630_20340 |
| CDR20291_1949  | putative N-acetyltransferase                                                                                | -4.072094  | 3.00E-10    |             |
| CDR20291_1951  | putative hydrolase                                                                                          | -3.8419226 | 0.021007837 | CD630_20430 |
| CDR20291_1953  | putative transcriptional regulator                                                                          | -2.1118201 | 0.013169261 | CD630_20450 |
| CDR20291_1955  | RpiR-family transcriptional regulator                                                                       | -4.1922098 | 0.003699725 | CD630_20480 |
| CDR20291_1975  | ABC transporter, ATP-binding protein                                                                        | -2.4553517 | 4.09E-17    | CD630_20680 |
| CDR20291_1988  | xanthine dehydrogenase iron-sulfur binding subunit                                                          | -9.9366736 | 2.17E-07    | CD630_20810 |
| CDR20291_1993  | putative iron-sulfur flavoprotein                                                                           | -2.1366208 | 0.017496433 | CD630_20860 |
| CDR20291_2009A | conserved hypothetical protein                                                                              | -7.6916051 | 0.000355235 | CD630_21021 |
| CDR20291_2011  | putative ABC transporter, permease protein                                                                  | -2.0940096 | 8.07E-11    | CD630_21040 |
| CDR20291_2019  | uncharacterised protein                                                                                     | -7.7436136 | 9.05E-09    | CD630_21120 |
| CDR20291_2021  | two-component system response regulator                                                                     | -2.9716981 | 1.17E-09    | CD630_21140 |
| CDR20291_2022A | uncharacterised protein                                                                                     | -9.6880104 | 1.70E-06    | CD630_21151 |
| CDR20291_2024  | thioredoxin reductase                                                                                       | -2.5181793 | 1.39E-06    | CD630_21170 |
| CDR20291_2027  | putative 2-nitropropane dioxygenase                                                                         | -5.5998864 | 6.38E-06    | CD630_21200 |
| CDR20291_2033  | putative membrane protein                                                                                   | -2.7937195 | 2.46E-07    | CD630_21260 |
| CDR20291_2043  | conserved hypothetical protein                                                                              | -8.6481252 | 4.75E-05    | CD630_21361 |
| CDR20291_2048  | D-alanyl-D-alanine carboxypeptidase                                                                         | -4.9225481 | 0.001467824 | CD630_21410 |
| CDR20291_2056A | conserved hypothetical protein                                                                              | -2.8935145 | 0.000429551 | CD630_21501 |
| CDR20291_2080  | probable amino-acid ABC transporter, substrate-binding protein                                              | -2.1985778 | 3.92E-09    | CD630_21740 |
| CDR20291_2084  | putative iron- sulfur subunit of hydrogenase                                                                | -3.8280441 | 1.01E-12    | CD630_21780 |

|                |                                                                       |            |             |             |
|----------------|-----------------------------------------------------------------------|------------|-------------|-------------|
| CDR20291_2088  | ATP-dependent RNA helicase                                            | -3.7428112 | 3.96E-09    | CD630_21830 |
| CDR20291_2090  | conserved hypothetical protein                                        | -4.3503167 | 1.18E-06    | CD630_21850 |
| CDR20291_2100  | putative regulator of a specific sugar metabolism                     | -2.8239443 | 4.05E-18    | CD630_21940 |
| CDR20291_2104  | putative subunit of oxidoreductase                                    | -3.8487376 | 0.013370592 | CD630_21980 |
| CDR20291_2105  | putative subunit of oxidoreductase                                    | -4.662126  | 8.83E-06    | CD630_21990 |
| CDR20291_2107  | putative histidinol-phosphate aminotransferase                        | -2.0576684 | 0.036443135 | CD630_22000 |
| CDR20291_2108  | lactose permease                                                      | -9.2484645 | 6.23E-11    | CD630_22010 |
| CDR20291_2111  | probable esterase                                                     | -3.6063187 | 0.013224119 | CD630_22040 |
| CDR20291_2121  | putative regulatory protein                                           | -12.670197 | 6.92E-21    | CD630_22140 |
| CDR20291_2124  | 3-dehydroquinate dehydratase                                          | -11.084701 | 6.97E-10    | CD630_22170 |
| CDR20291_2130  | anaerobic sulfite reductase subunit C                                 | -2.1313927 | 0.000425926 | CD630_22310 |
| CDR20291_2131  | anaerobic sulfite reductase subunit B                                 | -12.377263 | 3.95E-17    | CD630_22320 |
| CDR20291_2136  | conserved hypothetical protein                                        | -2.3867538 | 0.000569291 | CD630_22370 |
| CDR20291_2138  | putative sodium:solute symporter                                      | -5.9709701 | 3.82E-07    | CD630_22390 |
| CDR20291_2139  | N-acetylneuraminase lyase                                             | -11.619583 | 3.30E-11    | CD630_22400 |
| CDR20291_2149  | putative ATPase                                                       | -2.4578884 | 0.02173394  | CD630_22490 |
| CDR20291_2154  | putative amino acid recemase                                          | -3.9650669 | 0.013425787 | CD630_22540 |
| CDR20291_2156  | putative PTS system, IIc component                                    | -11.778832 | 2.25E-12    | CD630_22560 |
| CDR20291_2167  | PTS system, IIbc component                                            | -2.7669111 | 0.003439136 | CD630_22690 |
| CDR20291_2175  | sugar phosphate aldolase                                              | -11.534209 | 2.45E-11    | CD630_22770 |
| CDR20291_2176  | L-ribulose-5-phosphate 4-epimerase                                    | -3.327779  | 0.040792155 | CD630_22780 |
| CDR20291_2178  | PTS system, IIc component                                             | -2.6455975 | 8.11E-06    | CD630_22800 |
| CDR20291_2179  | PTS system, IIb component                                             | -10.670977 | 6.02E-09    | CD630_22810 |
| CDR20291_2182  | conserved hypothetical protein                                        | -3.1817851 | 6.83E-12    | CD630_22840 |
| CDR20291_2186  | putative membrane protein                                             | -11.630066 | 8.31E-12    | CD630_22870 |
| CDR20291_2213  | putative galactitol-1-phosphate 5-dehydrogenase                       | -11.062213 | 3.51E-09    | CD630_23240 |
| CDR20291_2220  | mannitol-1-phosphate 5-dehydrogenase                                  | -4.403616  | 3.56E-18    | CD630_23310 |
| CDR20291_2223  | PTS system, mannitol-specific IIbc component                          | -2.3862024 | 0.000727899 | CD630_23340 |
| CDR20291_2228  | 4-hydroxybutyrate CoA transferase                                     | -3.139444  | 1.35E-22    | CD630_23390 |
| CDR20291_2234  | LysR-family regulatory protein                                        | -2.9641958 | 4.86E-07    | CD630_23450 |
| CDR20291_2236  | putative Xaa-Pro dipeptidase                                          | -2.7409617 | 0.000268393 | CD630_23470 |
| CDR20291_2237  | glycine/sarcosine/betaine reductase complex component C alpha subunit | -10.348809 | 2.24E-07    | CD630_23480 |
| CDR20291_2238  | glycine/sarcosine/betaine reductase complex component C beta subunit  | -12.040825 | 5.76E-14    | CD630_23490 |
| CDR20291_2238A | hypothetical protein                                                  | -8.7855494 | 2.94E-05    |             |
| CDR20291_2239  | glycine reductase complex component B gamma subunit                   | -5.7136895 | 6.26E-05    | CD630_23510 |
| CDR20291_2240  | glycine/sarcosine/betaine reductase complex component A               | -11.409042 | 2.67E-11    | CD630_23520 |
| CDR20291_2241  | glycine reductase complex component B alpha and beta subunits         | -7.6874818 | 7.70E-26    | CD630_23540 |
| CDR20291_2242  | thioredoxin                                                           | -8.2261778 | 0.000102464 | CD630_23550 |
| CDR20291_2243  | thioredoxin reductase                                                 | -12.145871 | 1.16E-14    | CD630_23560 |

|               |                                                                             |            |             |             |
|---------------|-----------------------------------------------------------------------------|------------|-------------|-------------|
| CDR20291_2249 | abc transporter, permease protein                                           | -2.5266721 | 4.90E-08    | CD630_23620 |
| CDR20291_2258 | L-aspartate oxidase                                                         | -2.8908191 | 4.80E-05    | CD630_23710 |
| CDR20291_2259 | quinolinate synthetase A                                                    | -12.589537 | 9.22E-21    | CD630_23720 |
| CDR20291_2262 | uncharacterised protein                                                     | -2.1407735 | 0.006204169 | CD630_23750 |
| CDR20291_2267 | putative indolepyruvate oxidoreductase subunit                              | -3.512499  | 0.031863345 | CD630_23800 |
| CDR20291_2281 | putative membrane protein                                                   | -3.2000688 | 3.33E-13    | CD630_23910 |
| CDR20291_2282 | putative tRNA-binding protein                                               | -9.6713704 | 6.86E-12    | CD630_23920 |
| CDR20291_2289 | putative spore coat protein                                                 | -8.1535208 | 0.000118375 | CD630_23990 |
| CDR20291_2299 | transposase                                                                 | -9.0979844 | 9.32E-06    |             |
| CDR20291_2301 | pyruvate, phosphate dikinase                                                | -15.391292 | 7.44E-124   | CD630_24100 |
| CDR20291_2302 | putative pyruvate, phosphate dikinase regulatory protein                    | -9.7044456 | 4.98E-12    | CD630_24110 |
| CDR20291_2303 | putative transcriptional repressor ccpn                                     | -4.6579716 | 6.64E-20    | CD630_24120 |
| CDR20291_2305 | PTS system, IIa component                                                   | -9.9448657 | 1.11E-06    | CD630_24140 |
| CDR20291_2306 | putative sorbitol-like operon activator protein (Glucitol)                  | -2.9069618 | 0.004163173 | CD630_24150 |
| CDR20291_2308 | PTS system, glucitol/sorbitol-specific IIbc component                       | -2.3629065 | 0.000153578 | CD630_24170 |
| CDR20291_2310 | AraC-family transcriptional regulator                                       | -2.2129957 | 3.16E-05    | CD630_24190 |
| CDR20291_2311 | conserved hypothetical protein                                              | -2.2923252 | 1.51E-07    | CD630_24200 |
| CDR20291_2316 | phosphate butyryltransferase                                                | -5.2606181 | 0.000524157 | CD630_24250 |
| CDR20291_2327 | DNA repair protein                                                          | -10.240062 | 5.68E-07    | CD630_24350 |
| CDR20291_2334 | putative stage IV sporulation protein                                       | -3.6171875 | 1.40E-49    | CD630_24420 |
| CDR20291_2335 | putative sporulation protein yqfc                                           | -9.0043923 | 5.47E-05    | CD630_24430 |
| CDR20291_2338 | putative tRNA binding protein                                               | -5.9504504 | 4.18E-05    | CD630_24460 |
| CDR20291_2341 | putative radical SAM superfamily protein                                    | -7.8541487 | 4.03E-23    | CD630_24480 |
| CDR20291_2342 | putative methyltransferase                                                  | -5.864619  | 1.13E-23    | CD630_24490 |
| CDR20291_2345 | putative CRISPR-associated protein                                          | -3.867968  | 1.72E-08    | CD630_24520 |
| CDR20291_2346 | putative CRISPR-associated negative autoregulator                           | -6.752823  | 9.41E-09    | CD630_24530 |
| CDR20291_2353 | chaperone protein                                                           | -4.5047141 | 0.005621238 | CD630_24600 |
| CDR20291_2356 | heat-inducible transcription repressor                                      | -7.2351693 | 2.18E-16    | CD630_24630 |
| CDR20291_2361 | putative exported protein                                                   | -3.4753529 | 0.000623817 | CD630_24680 |
| CDR20291_2362 | putative stage II sporulation protein P                                     | -11.893307 | 5.43E-12    | CD630_24690 |
| CDR20291_2363 | germination protease                                                        | -10.866403 | 2.00E-09    | CD630_24700 |
| CDR20291_2376 | putative exported protein                                                   | -10.705959 | 7.97E-09    | CD630_24830 |
| CDR20291_2384 | mannose-6-phosphate isomerase                                               | -8.4224361 | 0.000120381 | CD630_24910 |
| CDR20291_2386 | selenocysteine-specific elongation factor                                   | -11.962276 | 1.62E-75    | CD630_24930 |
| CDR20291_2387 | L-seryl-tRNA(Sec) selenium transferase (selenocysteinyl-tRNA(Sec) synthase) | -10.999944 | 2.46E-32    | CD630_24950 |
| CDR20291_2388 | selenide,water dikinase                                                     | -12.739132 | 6.13E-24    | CD630_24960 |
| CDR20291_2389 | putative competence protein                                                 | -11.202403 | 2.82E-10    | CD630_24970 |
| CDR20291_2403 | transcriptional antiterminator                                              | -5.3143299 | 0.000436624 | CD630_25110 |
| CDR20291_2404 | PTS system, IIa component                                                   | -6.8157987 | 4.30E-06    | CD630_25120 |

|               |                                                                                 |            |             |             |
|---------------|---------------------------------------------------------------------------------|------------|-------------|-------------|
| CDR20291_2405 | putative translation inhibitor endoribonuclease                                 | -9.9417142 | 1.99E-06    | CD630_25130 |
| CDR20291_2412 | putative metal dependent phosphohydrolase                                       | -11.297812 | 2.34E-09    | CD630_25230 |
| CDR20291_2418 | putative membrane protein                                                       | -4.0299175 | 0.016987686 | CD630_25310 |
| CDR20291_2426 | ribonuclease Z                                                                  | -10.8226   | 2.61E-09    | CD630_25390 |
| CDR20291_2427 | NADH oxidase                                                                    | -3.7040065 | 1.41E-42    | CD630_25400 |
| CDR20291_2428 | sodium:dicarboxylate symporter family protein                                   | -3.0517887 | 2.53E-20    | CD630_25410 |
| CDR20291_2438 | putative phosphosugar isomerase/binding protein                                 | -2.8180186 | 6.38E-05    | CD630_25520 |
| CDR20291_2439 | phosphotransferase system, C component                                          | -4.7117784 | 2.49E-06    | CD630_25530 |
| CDR20291_2440 | phosphotransferase system, B component                                          | -9.3272539 | 3.52E-06    | CD630_25550 |
| CDR20291_2444 | rna methyltransferase, rsmD family                                              | -8.2807671 | 0.000170066 | CD630_25590 |
| CDR20291_2446 | putative phosphatase                                                            | -2.0509633 | 9.93E-14    | CD630_25610 |
| CDR20291_2450 | MerR-family transcriptional regulator                                           | -2.3581326 | 0.000202293 | CD630_25640 |
| CDR20291_2452 | PTS system, IIa component                                                       | -2.7616728 | 0.013722841 | CD630_25660 |
| CDR20291_2456 | two-component sensor histidine kinase                                           | -4.3090347 | 2.65E-14    | CD630_25700 |
| CDR20291_2467 | ribosomal RNA small subunit methyltransferase                                   | -4.2066201 | 8.63E-41    | CD630_25810 |
| CDR20291_2469 | putative membrane protein                                                       | -2.1974146 | 3.06E-13    | CD630_25830 |
| CDR20291_2479 | fibronectin-binding protein                                                     | -3.6911719 | 3.55E-08    | CD630_25920 |
| CDR20291_2482 | PyrR bifunctional protein                                                       | -3.6320033 | 9.72E-05    | CD630_25950 |
| CDR20291_2483 | putative pseudouridylate synthase                                               | -5.2947999 | 4.99E-32    | CD630_25960 |
| CDR20291_2484 | lipoprotein signal peptidase                                                    | -3.1852481 | 9.27E-10    | CD630_25970 |
| CDR20291_2494 | 5'-methylthioadenosine/S-adenosylhomocysteine nucleosidase                      | -3.1920874 | 0.018485224 | CD630_26110 |
| CDR20291_2508 | putative exported protein                                                       | -3.8762875 | 1.60E-10    | CD630_26240 |
| CDR20291_2513 | stage IV sporulation protein A                                                  | -10.117047 | 2.19E-64    | CD630_26290 |
| CDR20291_2516 | cobalt dependent x-pro dipeptidase                                              | -3.429234  | 6.17E-19    |             |
| CDR20291_2530 | RNA polymerase sigma-G factor                                                   | -11.244002 | 2.32E-10    | CD630_26420 |
| CDR20291_2531 | RNA polymerase sigma-E factor                                                   | -11.156865 | 5.97E-10    | CD630_26430 |
| CDR20291_2532 | sporulation sigma-E factor processing peptidase                                 | -12.622688 | 8.35E-20    | CD630_26440 |
| CDR20291_2535 | putative membrane protein                                                       | -3.6924701 | 1.14E-16    | CD630_26470 |
| CDR20291_2538 | putative cell division protein                                                  | -2.7030835 | 3.95E-08    | CD630_26500 |
| CDR20291_2540 | cell division/stage V sporulation protein                                       | -11.963422 | 3.28E-13    | CD630_26520 |
| CDR20291_2544 | stage V sporulation protein D (sporulation specific penicillin-binding protein) | -9.7570052 | 1.34E-93    | CD630_26560 |
| CDR20291_2545 | putative membrane protein                                                       | -11.204023 | 2.58E-10    | CD630_26570 |
| CDR20291_2547 | prolipoprotein diacylglycerol transferase                                       | -4.019416  | 8.64E-09    | CD630_26590 |
| CDR20291_2549 | probable peptidase                                                              | -3.6457999 | 7.54E-25    | CD630_26610 |
| CDR20291_2550 | putative GTP-binding protein                                                    | -2.4687371 | 0.00090809  | CD630_26620 |
| CDR20291_2555 | PTS system, glucose-specific IIbc component                                     | -11.141219 | 3.16E-09    | CD630_26670 |
| CDR20291_2556 | putative transcription antiterminator                                           | -3.3218843 | 0.00133179  | CD630_26680 |
| CDR20291_2558 | oligopeptide ABC transporter, ATP-binding protein                               | -5.169571  | 3.16E-15    | CD630_26700 |
| CDR20291_2559 | oligopeptide transporter, ATP-binding protein                                   | -4.0626759 | 5.90E-05    | CD630_26710 |

|               |                                                                                                 |            |             |             |
|---------------|-------------------------------------------------------------------------------------------------|------------|-------------|-------------|
| CDR20291_2569 | putative Calcium-chelating exported protein                                                     | -8.9340908 | 1.48E-05    | CD630_26810 |
| CDR20291_2570 | pyruvate-flavodoxin oxidoreductase                                                              | -5.1476397 | 0.000118426 | CD630_26820 |
| CDR20291_2573 | putative regulatory protein                                                                     | -9.2798079 | 2.64E-86    | CD630_26850 |
| CDR20291_2574 | putative membrane protein                                                                       | -4.5967899 | 8.56E-06    | CD630_26860 |
| CDR20291_2575 | conserved hypothetical protein                                                                  | -2.5918402 | 0.001545382 | CD630_26870 |
| CDR20291_2584 | putative aminotransferase                                                                       | -3.1166896 | 0.001183274 | CD630_26960 |
| CDR20291_2585 | putative amidohydrolase                                                                         | -6.7686179 | 4.34E-08    | CD630_26970 |
| CDR20291_2586 | putative permease                                                                               | -5.6950739 | 0.000142886 | CD630_26980 |
| CDR20291_2587 | putative membrane protein                                                                       | -4.2325168 | 8.10E-05    | CD630_26990 |
| CDR20291_2610 | two-component sensor histidine kinase                                                           | -6.6711311 | 5.72E-83    | CD630_27210 |
| CDR20291_2611 | two-component response regulator                                                                | -12.477401 | 2.39E-97    | CD630_27220 |
| CDR20291_2613 | probable polysaccharide deacetylase                                                             | -11.699848 | 6.90E-64    | CD630_27240 |
| CDR20291_2614 | putative UDP-NAM-NAG-(pentapeptide) pyrophosphoryl-undecaprenol N-acetylglucosamine transferase | -3.4373396 | 1.41E-42    | CD630_27250 |
| CDR20291_2618 | putative regulator of the sigma(E) factor                                                       | -11.347095 | 1.40E-10    | CD630_27290 |
| CDR20291_2619 | conserved hypothetical protein                                                                  | -6.0667062 | 1.93E-05    | CD630_27300 |
| CDR20291_2620 | putative membrane protein                                                                       | -3.9902957 | 8.37E-09    | CD630_27310 |
| CDR20291_2634 | adenine phosphoribosyltransferase                                                               | -10.405209 | 3.29E-08    | CD630_27450 |
| CDR20291_2638 | putative radical SAM family protein                                                             | -11.421514 | 2.16E-11    | CD630_27490 |
| CDR20291_2640 | accessory gene regulator                                                                        | -2.1481229 | 1.52E-12    | CD630_27500 |
| CDR20291_2642 | conserved hypothetical protein                                                                  | -4.8800948 | 0.001850864 | CD630_27520 |
| CDR20291_2643 | phosphoenolpyruvate-protein phosphotransferase                                                  | -12.58436  | 4.12E-20    | CD630_27550 |
| CDR20291_2644 | PTS system, phosphocarrier protein                                                              | -8.5080537 | 8.07E-05    | CD630_27560 |
| CDR20291_2646 | putative DNA modification methylase                                                             | -2.6739078 | 5.23E-27    | CD630_27580 |
| CDR20291_2654 | putative penicillin-binding protein repressor                                                   | -9.935973  | 3.09E-07    | CD630_27660 |
| CDR20291_2667 | putative mannose-1-phosphate guanylyltransferase                                                | -8.6127756 | 3.37E-05    | CD630_27790 |
| CDR20291_2689 | putative membrane protein                                                                       | -4.5624533 | 0.004902293 | CD630_28000 |
| CDR20291_2691 | queuine tRNA-ribosyltransferase                                                                 | -2.1513639 | 0.00052262  | CD630_28020 |
| CDR20291_2693 | S-adenosylmethionine:tRNA ribosyltransferase-isomerase                                          | -2.6981693 | 3.21E-05    | CD630_28040 |
| CDR20291_2696 | crossover junction endodeoxyribonuclease RuvC                                                   | -8.4361974 | 0.000103484 | CD630_28070 |
| CDR20291_2702 | 2-hydroxy-3-oxopropionate reductase                                                             | -9.7956307 | 4.45E-07    | CD630_28130 |
| CDR20291_2709 | transposase                                                                                     | -3.2792734 | 0.042275738 |             |
| CDR20291_2711 | putative membrane protein                                                                       | -11.066016 | 9.28E-10    | CD630_28210 |
| CDR20291_2712 | putative peptidase                                                                              | -7.0920009 | 4.24E-12    | CD630_28220 |
| CDR20291_2714 | putative membrane protein                                                                       | -3.3436557 | 3.06E-05    |             |
| CDR20291_2729 | putative two-component response regulator                                                       | -2.7986726 | 6.08E-05    | CD630_28380 |
| CDR20291_2736 | rubrerythrin                                                                                    | -2.3888036 | 2.25E-08    | CD630_28450 |
| CDR20291_2751 | putative membrane protein                                                                       | -12.719602 | 3.27E-23    | CD630_28600 |
| CDR20291_2752 | putative membrane protein                                                                       | -10.956661 | 5.95E-09    | CD630_28610 |
| CDR20291_2753 | putative dipeptidase                                                                            | -4.8143465 | 0.000955596 | CD630_28620 |

|                |                                                                |            |             |             |
|----------------|----------------------------------------------------------------|------------|-------------|-------------|
| CDR20291_2758  | putative lantibiotic ABC transporter, ATP-binding protein      | -9.1798129 | 1.46E-05    | CD630_03640 |
| CDR20291_2760  | two-component system, sensor histidine kinase                  | -2.1773023 | 8.36E-05    | CD630_03610 |
| CDR20291_2770  | putative drug/sodium antiporter                                | -2.6145223 | 8.19E-05    | CD630_28740 |
| CDR20291_2771  | putative ferrichrome ABC transporter, ATP-binding protein      | -11.077312 | 8.23E-10    | CD630_28750 |
| CDR20291_2776  | PTS system, lichenan-specific IIa component                    | -6.8812841 | 5.14E-05    | CD630_28800 |
| CDR20291_2790  | V-type sodium ATP synthase subunit G                           | -4.9408888 | 0.002261274 | CD630_29561 |
| CDR20291_2791  | V-type sodium ATP synthase subunit C                           | -4.5449587 | 0.004016583 | CD630_29570 |
| CDR20291_2796  | conserved hypothetical protein                                 | -10.141353 | 1.76E-07    | CD630_29620 |
| CDR20291_2800  | aldehyde-alcohol dehydrogenase                                 | -3.2532502 | 1.54E-09    | CD630_29660 |
| CDR20291_2810  | putative CRISPR-associated Cas2 family protein                 | -2.2808838 | 0.017481093 | CD630_29750 |
| CDR20291_2811  | putative CRISPR-associated Cas1 family protein                 | -2.0996766 | 7.03E-16    | CD630_29760 |
| CDR20291_2812  | putative CRISPR-associated Cas4 family protein                 | -3.8525046 | 7.52E-09    | CD630_29770 |
| CDR20291_2814  | putative CRISPR-associated Cas5 family protein                 | -3.9032115 | 2.08E-28    | CD630_29790 |
| CDR20291_2816  | putative CRISPR-associated protein, CXXC-CXXC                  | -3.4462443 | 6.98E-21    | CD630_29810 |
| CDR20291_2817  | putative CRISPR-associated Cas6 family protein                 | -4.6964108 | 7.96E-08    | CD630_29820 |
| CDR20291_2820  | ABC transporter, ATP-binding protein                           | -2.3666076 | 0.007825733 | CD630_29850 |
| CDR20291_2821  | undecaprenyl-diphosphatase                                     | -2.9827166 | 0.005321511 | CD630_29860 |
| CDR20291_2823  | two-component system response regulator                        | -12.425425 | 6.02E-18    | CD630_29880 |
| CDR20291_2826  | putative ABC transporter, permease protein                     | -4.1852387 | 3.91E-12    | CD630_29910 |
| CDR20291_2827  | conserved hypothetical protein                                 | -2.061318  | 3.85E-05    | CD630_29920 |
| CDR20291_2836  | putative dihydrodipicolinate synthase                          | -4.9681551 | 1.21E-16    | CD630_30000 |
| CDR20291_2838  | probable carbohydrate hydrolase                                | -4.3720453 | 1.32E-17    | CD630_30020 |
| CDR20291_2839  | probable carbohydrate hydrolase (N-terminus)                   | -11.768738 | 2.29E-12    | CD630_30030 |
| CDR20291_2840  | putative carbohydrate permease                                 | -11.516867 | 8.87E-12    | CD630_30040 |
| CDR20291_2844  | Fragment of conserved hypothetical protein (N-terminal region) | -3.8663419 | 5.53E-12    | CD630_30080 |
| CDR20291_2848  | putative glycosyl hydrolase                                    | -3.2928482 | 2.28E-31    | CD630_30120 |
| CDR20291_2856  | Fragment of conserved hypothetical protein,DUF1848 family      | -4.1962539 | 6.77E-27    | CD630_30200 |
| CDR20291_2862  | PTS system, glucose-specific IIa component                     | -4.3233516 | 2.27E-06    | CD630_30270 |
| CDR20291_2863  | putative phosphosugar isomerase                                | -5.1849616 | 0.000627812 | CD630_30280 |
| CDR20291_2865  | PTS system, maltose and glucose-specific IIbc component        | -3.5140984 | 1.41E-08    | CD630_30300 |
| CDR20291_2868  | thioredoxin                                                    | -10.970905 | 3.11E-08    | CD630_30330 |
| CDR20291_2874  | putative ATPase                                                | -3.7948625 | 7.90E-06    | CD630_30390 |
| CDR20291_2877  | putative membrane protein                                      | -2.2545385 | 5.47E-16    | CD630_30420 |
| CDR20291_2883  | PTS system, IIc component                                      | -11.342006 | 6.86E-11    | CD630_30480 |
| CDR20291_2885  | putative membrane protein                                      | -2.1044696 | 7.14E-05    | CD630_30500 |
| CDR20291_2890  | ABC transporter, ATP-binding protein                           | -4.7596734 | 6.25E-10    | CD630_30560 |
| CDR20291_2895  | PTS system, IIbc component                                     | -11.244827 | 2.58E-10    | CD630_30610 |
| CDR20291_2898  | xylose isomerase                                               | -2.2453444 | 7.28E-05    | CD630_30640 |
| CDR20291_2910A | hypothetical protein                                           | -2.1936052 | 7.62E-11    |             |



|                |                                                          |            |             |             |
|----------------|----------------------------------------------------------|------------|-------------|-------------|
| CDR20291_2916  | phosphosugar-binding transcriptional regulator           | -2.0706985 | 0.004525013 | CD630_30770 |
| CDR20291_2918  | 6-phospho-beta-glucosidase                               | -5.1835801 | 0.000232599 | CD630_30790 |
| CDR20291_2922  | transcription antiterminator                             | -2.2293826 | 4.48E-07    | CD630_30830 |
| CDR20291_2930  | trehalose-6-phosphate hydrolase                          | -10.917541 | 7.51E-09    | CD630_30910 |
| CDR20291_2935  | PTS system, IIbc component                               | -2.406143  | 1.91E-05    | CD630_30970 |
| CDR20291_2939  | PTS system, IIbc component                               | -3.4264691 | 0.000722244 | CD630_31010 |
| CDR20291_2957  | putative exported protein                                | -3.0368921 | 2.48E-07    | CD630_31180 |
| CDR20291_2962  | predicted enoate reductase                               | -4.0993423 | 3.65E-15    |             |
| CDR20291_2964  | transcriptional regulator, padr-like family              | -2.3288528 | 0.001252172 |             |
| CDR20291_2965  | putative flavodoxin                                      | -2.2116619 | 6.64E-07    | CD630_31210 |
| CDR20291_2966  | ArsR-family transcriptional regulator                    | -5.7622049 | 5.05E-05    | CD630_31220 |
| CDR20291_2967  | putative nitroreductase                                  | -4.2444797 | 1.07E-24    | CD630_31230 |
| CDR20291_2976  | PTS system, IIa component                                | -2.9001677 | 5.67E-05    | CD630_31320 |
| CDR20291_2978  | PTS system, IIbc component                               | -2.283737  | 0.000276631 | CD630_31340 |
| CDR20291_2983A | Transcriptional regulator, Phage-type                    | -8.3469313 | 1.32E-06    | CD630_31390 |
| CDR20291_2983B | putative membrane protein                                | -2.1047877 | 3.56E-13    | CD630_31400 |
| CDR20291_2985  | putative transcriptional regulator                       | -2.5602737 | 4.72E-11    | CD630_31440 |
| CDR20291_2988  | hypothetical protein                                     | -3.3646465 | 1.06E-13    |             |
| CDR20291_2993  | hypothetical protein                                     | -9.842435  | 7.79E-07    |             |
| CDR20291_2994  | crispr-associated helicase cas3                          | -2.3609204 | 7.63E-21    |             |
| CDR20291_2995  | crispr-associated autoregulator, devr family             | -3.5524792 | 3.39E-14    |             |
| CDR20291_2999  | hypothetical protein                                     | -3.7948936 | 6.39E-06    |             |
| CDR20291_2999A | hypothetical protein                                     | -10.066082 | 1.32E-07    |             |
| CDR20291_3001  | putative phage protein                                   | -12.140992 | 1.38E-14    | CD630_31510 |
| CDR20291_3002  | conserved hypothetical protein                           | -10.998107 | 1.60E-09    | CD630_31520 |
| CDR20291_3003  | putative phage transcriptional regulator                 | -9.2487412 | 7.27E-06    | CD630_31521 |
| CDR20291_3004  | putative phage DNA-binding protein                       | -9.2969411 | 4.27E-06    | CD630_31530 |
| CDR20291_3013  | putative acetyltransferase                               | -2.5610565 | 4.01E-06    | CD630_31590 |
| CDR20291_3017  | conserved hypothetical protein                           | -2.183812  | 0.015448132 | CD630_31630 |
| CDR20291_3019  | uncharacterised protein                                  | -9.8547377 | 1.18E-06    | CD630_31650 |
| CDR20291_3020  | putative transcriptional regulator                       | -2.0360951 | 0.040671178 | CD630_31660 |
| CDR20291_3022  | conserved hypothetical protein                           | -2.8332074 | 0.00605395  | CD630_31680 |
| CDR20291_3023  | putative transporter                                     | -10.441675 | 4.48E-20    | CD630_31690 |
| CDR20291_3031  | central glycolytic genes regulator                       | -10.319368 | 3.91E-07    | CD630_31750 |
| CDR20291_3032  | RNA polymerase sigma-54 factor                           | -10.87862  | 1.91E-09    | CD630_31760 |
| CDR20291_3034  | D-hydantoinase                                           | -2.6819636 | 1.05E-09    | CD630_31780 |
| CDR20291_3035  | putative dihydroorotate dehydrogenase, catalytic subunit | -2.0669713 | 0.007351074 | CD630_31790 |
| CDR20291_3036  | xanthine permease                                        | -2.551315  | 0.000603556 | CD630_31800 |
| CDR20291_3039  | putative amidohydrolase                                  | -4.2564068 | 1.95E-27    | CD630_31830 |

|               |                                                                   |            |             |             |
|---------------|-------------------------------------------------------------------|------------|-------------|-------------|
| CDR20291_3045 | putative iron-sulfur flavoprotein                                 | -2.329184  | 0.00139838  | CD630_31890 |
| CDR20291_3046 | MerR-family transcriptional regulator                             | -4.6323914 | 6.03E-05    | CD630_31900 |
| CDR20291_3051 | possible sensor histidine kinase                                  | -7.1067582 | 8.48E-11    |             |
| CDR20291_3056 | putative penicillin-binding protein                               | -2.6677763 | 0.000881026 | CD630_31960 |
| CDR20291_3059 | putative ABC transporter, permease protein                        | -3.0474555 | 1.21E-05    | CD630_31990 |
| CDR20291_3061 | ABC transporter, ATP-binding protein                              | -6.0897362 | 9.42E-06    | CD630_32010 |
| CDR20291_3069 | conserved hypothetical protein                                    | -2.3557632 | 0.001696595 | CD630_32100 |
| CDR20291_3074 | putative osmoprotectant acid ABC transporter, ATP-binding protein | -3.2809222 | 0.000981009 | CD630_32150 |
| CDR20291_3078 | chaperonin                                                        | -5.0826868 | 1.04E-15    | CD630_32190 |
| CDR20291_3079 | putative methyltransferase                                        | -4.3757583 | 0.002262804 | CD630_32200 |
| CDR20291_3083 | dihydrodipicolinate synthase                                      | -3.2898646 | 4.83E-21    | CD630_32230 |
| CDR20291_3092 | conserved hypothetical protein, UPF0597 family                    | -3.0694132 | 4.37E-05    | CD630_32320 |
| CDR20291_3095 | single-stranded DNA binding protein                               | -4.215445  | 4.42E-06    | CD630_32350 |
| CDR20291_3097 | putative proline racemase                                         | -6.2922358 | 5.28E-06    | CD630_32370 |
| CDR20291_3101 | proline reductase                                                 | -10.853749 | 2.18E-09    | CD630_32410 |
| CDR20291_3102 | conserved hypothetical protein                                    | -10.042319 | 3.64E-07    | CD630_32430 |
| CDR20291_3103 | proline reductase subunit proprotein                              | -11.96308  | 3.50E-13    | CD630_32440 |
| CDR20291_3104 | sigma-54-dependent transcriptional activator                      | -6.8726207 | 4.05E-30    | CD630_32450 |
| CDR20291_3105 | putative electron transfer protein                                | -5.2982155 | 0.000161875 | CD630_32470 |
| CDR20291_3107 | small acid-soluble spore protein B                                | -6.9905882 | 4.11E-05    | CD630_32490 |
| CDR20291_3113 | two-component response regulator                                  | -2.917973  | 1.41E-33    | CD630_32550 |
| CDR20291_3115 | putative polysaccharide deacetylase                               | -3.1469685 | 1.79E-13    | CD630_32570 |
| CDR20291_3116 | iron-only hydrogenase                                             | -2.9576056 | 2.76E-05    | CD630_32580 |
| CDR20291_3117 | putative membrane protein                                         | -2.0329158 | 2.49E-15    | CD630_32590 |
| CDR20291_3118 | putative phosphate transport system protein                       | -2.6445892 | 0.000155749 | CD630_32600 |
| CDR20291_3132 | conserved hypothetical protein                                    | -9.50049   | 9.67E-06    | CD630_32710 |
| CDR20291_3133 | putative membrane protein                                         | -4.2705216 | 0.010534144 | CD630_32720 |
| CDR20291_3134 | putative ferrous iron transport protein A                         | -3.9029582 | 4.61E-08    | CD630_32730 |
| CDR20291_3135 | putative ferrous iron transport protein B                         | -3.0324582 | 5.63E-27    | CD630_32740 |
| CDR20291_3138 | PTS system, IIc component                                         | -10.928494 | 1.52E-09    | CD630_32770 |
| CDR20291_3140 | PTS system, IIb component                                         | -5.1459732 | 0.000807269 | CD630_32790 |
| CDR20291_3152 | putative exported protein                                         | -6.3497747 | 1.48E-07    | CD630_32910 |
| CDR20291_3153 | putative membrane protein                                         | -3.5117255 | 0.000108866 | CD630_32920 |
| CDR20291_3154 | putative pilus assembly protein                                   | -3.9386913 | 2.43E-07    | CD630_32930 |
| CDR20291_3155 | putative type IV pilin                                            | -4.546177  | 7.40E-06    | CD630_32940 |
| CDR20291_3156 | putative type IV pilus-assembly protein                           | -3.3394235 | 6.53E-10    | CD630_32950 |
| CDR20291_3157 | putative type IV pilus-assembly protein                           | -2.3135129 | 1.04E-11    | CD630_32960 |
| CDR20291_3159 | putative ATP/GTP-binding protein                                  | -4.4567502 | 0.002833391 | CD630_32980 |
| CDR20291_3160 | probable transporter                                              | -7.1734412 | 1.81E-21    | CD630_32990 |

|                |                                                       |            |             |             |
|----------------|-------------------------------------------------------|------------|-------------|-------------|
| CDR20291_3163  | chromate transport protein                            | -11.545148 | 4.56E-10    | CD630_33020 |
| CDR20291_3164  | chromate transport protein                            | -11.416194 | 2.31E-11    | CD630_33030 |
| CDR20291_3167  | trigger factor                                        | -2.629523  | 0.010606117 | CD630_33060 |
| CDR20291_3169  | ribonuclease Ph                                       | -3.1011272 | 3.21E-05    | CD630_33080 |
| CDR20291_3172  | conserved hypothetical protein                        | -2.6463275 | 1.74E-12    | CD630_33110 |
| CDR20291_3174  | electron transport protein                            | -2.0019696 | 3.19E-10    | CD630_33130 |
| CDR20291_3177  | conserved hypothetical protein                        | -3.5677684 | 9.14E-11    | CD630_33151 |
| CDR20291_3181  | two-component response regulator                      | -2.639447  | 4.70E-10    | CD630_33200 |
| CDR20291_3183  | conserved hypothetical protein                        | -2.1847543 | 3.72E-06    | CD630_33220 |
| CDR20291_3185  | abc transporter, atp-binding protein                  | -3.0224801 | 2.99E-12    |             |
| CDR20291_3187  | accessory gene regulator                              | -5.4458902 | 8.50E-20    |             |
| CDR20291_3197  | GntR-family transcriptional regulator                 | -3.0486437 | 4.38E-19    | CD630_33530 |
| CDR20291_3205  | putative multidrug efflux protein                     | -2.2351303 | 1.89E-15    | CD630_33610 |
| CDR20291_3206  | ABC transporter, permease protein                     | -2.448778  | 1.21E-20    | CD630_33620 |
| CDR20291_3208  | ABC transporter, ATP-binding protein                  | -3.9055961 | 2.43E-24    | CD630_33640 |
| CDR20291_3212  | putative GTPase                                       | -3.2434978 | 7.81E-06    | CD630_33680 |
| CDR20291_3213A | conserved hypothetical protein                        | -2.4609883 | 0.000850949 | CD630_33682 |
| CDR20291_3214  | conserved hypothetical protein                        | -2.6791876 | 5.85E-16    | CD630_33690 |
| CDR20291_3216  | pyruvate kinase                                       | -5.5790519 | 0.000153578 | CD630_33940 |
| CDR20291_3231  | HPr(Ser) kinase/phosphorylase                         | -12.256858 | 1.99E-15    | CD630_34090 |
| CDR20291_3237  | ABC transporter, permease protein                     | -2.2017776 | 0.03346615  | CD630_34150 |
| CDR20291_3257  | cobyric acid synthase                                 | -2.5120312 | 6.20E-11    | CD630_34350 |
| CDR20291_3266  | PTS system, IIb component                             | -2.7192074 | 7.92E-12    | CD630_34440 |
| CDR20291_3267  | PTS system, IIa component                             | -8.1903189 | 0.000108644 | CD630_34450 |
| CDR20291_3268  | endoglucanase                                         | -2.7913119 | 3.48E-13    | CD630_34460 |
| CDR20291_3271  | putative tagatose-6-phosphate ketose/aldose isomerase | -3.4392175 | 3.12E-09    | CD630_34490 |
| CDR20291_3274  | GntR-family transcriptional regulator                 | -3.5224106 | 3.90E-12    | CD630_34520 |
| CDR20291_3277  | putative exported protein                             | -3.0833136 | 6.99E-05    | CD630_02810 |
| CDR20291_3278  | putative exported protein                             | -12.274946 | 3.01E-15    |             |
| CDR20291_3280  | hypothetical protein                                  | -3.3737859 | 1.07E-09    |             |
| CDR20291_3282  | hypothetical protein                                  | -2.882911  | 0.000409339 |             |
| CDR20291_3283  | hypothetical protein                                  | -4.4388776 | 0.005927078 |             |
| CDR20291_3284  | phage portal protein                                  | -2.1563563 | 6.69E-07    |             |
| CDR20291_3284A | hypothetical protein                                  | -2.3626531 | 0.012233237 |             |
| CDR20291_3286A | hypothetical protein                                  | -2.4929718 | 3.28E-10    |             |
| CDR20291_3287  | hypothetical protein                                  | -4.6542654 | 0.002235476 |             |
| CDR20291_3293  | putative exported protein                             | -8.891722  | 2.62E-05    | CD630_34570 |
| CDR20291_3295  | transketolase, pyridine binding subunit               | -2.9132522 | 0.001017629 | CD630_34590 |
| CDR20291_3296  | transketolase, thiamine disphosphate-binding subunit  | -4.6920328 | 0.002215223 | CD630_34600 |

|                |                                                                              |            |             |             |
|----------------|------------------------------------------------------------------------------|------------|-------------|-------------|
| CDR20291_3321  | protein methyltransferase                                                    | -11.227735 | 1.82E-10    | CD630_34850 |
| CDR20291_3327  | stage II sporulation protein e                                               | -8.5691356 | 5.28E-101   | CD630_34900 |
| CDR20291_3329  | putative septum formation protein                                            | -4.1651988 | 2.45E-08    | CD630_34920 |
| CDR20291_3331  | putative spore protein                                                       | -3.8138802 | 0.000420947 | CD630_34940 |
| CDR20291_3336  | stage V sporulation protein T                                                | -6.9443228 | 9.31E-10    | CD630_34990 |
| CDR20291_3353  | stage V sporulation protein G                                                | -11.351414 | 4.38E-11    | CD630_35160 |
| CDR20291_3354  | putative transcriptional repressor                                           | -2.3802941 | 2.70E-15    | CD630_35170 |
| CDR20291_3356  | putative exported protein                                                    | -11.960059 | 1.67E-74    | CD630_35190 |
| CDR20291_3364  | putative iron ABC transporter, permease protein                              | -3.0355244 | 2.61E-17    | CD630_35290 |
| CDR20291_3365  | putative iron ABC transporter, ATP-binding protein                           | -12.459034 | 1.57E-17    | CD630_35300 |
| CDR20291_3366  | putative phosphoesterase                                                     | -3.136741  | 4.18E-07    | CD630_35310 |
| CDR20291_3368  | phosphonate ABC transporter, ATP-binding protein                             | -12.114972 | 4.80E-14    | CD630_35330 |
| CDR20291_3369  | phosphonate ABC transporter, ATP-binding protein                             | -3.6816525 | 1.06E-10    | CD630_35340 |
| CDR20291_3371  | putative phosphonate metabolism protein                                      | -12.200722 | 5.95E-15    | CD630_35360 |
| CDR20291_3372  | putative phosphonate metabolism protein                                      | -2.5483268 | 0.000885527 | CD630_35370 |
| CDR20291_3373  | putative phosphonate metabolism protein                                      | -10.169386 | 1.41E-16    | CD630_35380 |
| CDR20291_3386  | putative arginine decarboxylase                                              | -10.597952 | 2.03E-24    | CD630_35510 |
| CDR20291_3388  | conserved hypothetical protein                                               | -12.084201 | 8.52E-14    | CD630_35512 |
| CDR20291_3396  | cell division protein                                                        | -9.6294125 | 3.70E-32    | CD630_35590 |
| CDR20291_3400  | putative spore cortex-lytic enzyme                                           | -3.4945141 | 4.94E-05    | CD630_35630 |
| CDR20291_3401  | stage II sporulation protein                                                 | -7.9350046 | 2.50E-29    | CD630_35640 |
| CDR20291_3402  | GntR-family transcriptional regulator                                        | -2.2598549 | 2.08E-15    | CD630_35650 |
| CDR20291_3404  | putative cell wall hydrolase                                                 | -11.855732 | 9.86E-125   | CD630_35670 |
| CDR20291_3410  | conserved hypothetical protein                                               | -4.818207  | 6.17E-18    | CD630_35720 |
| CDR20291_3411  | conserved hypothetical protein                                               | -2.6239525 | 0.000712165 | CD630_35730 |
| CDR20291_3412  | putative membrane protein                                                    | -13.084245 | 2.18E-32    | CD630_35740 |
| CDR20291_3413  | putative sodium:solute symporter                                             | -2.6263424 | 1.74E-14    | CD630_35750 |
| CDR20291_3414  | probable transporter                                                         | -4.101492  | 6.16E-34    | CD630_35760 |
| CDR20291_3423  | ABC transporter, ATP-binding protein                                         | -3.4507011 | 0.000103179 | CD630_35850 |
| CDR20291_3424  | two-component sensor histidine kinase                                        | -2.1452664 | 0.004851489 | CD630_35860 |
| CDR20291_3432  | conserved hypothetical protein                                               | -4.8514038 | 4.07E-08    | CD630_35940 |
| CDR20291_3451  | uncharacterised protein                                                      | -2.6893384 | 2.01E-07    | CD630_36130 |
| CDR20291_3454A | putative conjugative transposon protein DUF961 family Tn916-like, CTn1-Orf29 | -8.7031207 | 2.67E-05    | CD630_03840 |
| CDR20291_3458  | putative conjugative transposon FtsK_SpoIIIE-related protein                 | -8.2376322 | 1.34E-07    | CD630_33890 |
| CDR20291_3459  | putative conjugative transposon replication initiation factor                | -7.2348404 | 1.86E-07    | CD630_03810 |
| CDR20291_3464  | conjugative transposon protein                                               | -10.441334 | 2.63E-08    | CD630_03740 |
| CDR20291_3471  | putative abc transporter, permease protein                                   | -11.016683 | 1.93E-08    |             |
| CDR20291_3473  | putative cation efflux protein                                               | -11.530523 | 8.09E-12    |             |
| CDR20291_3473C | putative conjugative transposon protein Tn916-like, CTn1-Orf14               | -8.9341856 | 3.86E-05    | CD630_03690 |

|               |                                               |            |             |             |
|---------------|-----------------------------------------------|------------|-------------|-------------|
| CDR20291_3475 | integrase                                     | -3.4483986 | 0.037922831 | CD630_03550 |
| CDR20291_3479 | conserved hypothetical protein                | -2.3605117 | 1.30E-11    | CD630_36170 |
| CDR20291_3481 | putative acetyltransferase                    | -2.6064268 | 2.22E-16    | CD630_36190 |
| CDR20291_3485 | putative ABC transporter, ATP-binding protein | -2.2401332 | 5.98E-05    | CD630_36230 |
| CDR20291_3491 | putative PTS system, IIb component            | -9.195605  | 6.03E-06    | CD630_36300 |
| CDR20291_3494 | putative membrane protein                     | -5.5774219 | 0.000184998 | CD630_36360 |
| CDR20291_3495 | putative phage-related protein                | -6.4512863 | 4.46E-06    | CD630_36361 |
| CDR20291_3497 | conserved hypothetical protein                | -10.470481 | 2.60E-21    | CD630_36380 |
| CDR20291_3527 | selenium metabolism protein yedf              | -8.7756798 | 1.54E-08    | CD630_36670 |
| CDR20291_3528 | putative transcriptional regulator            | -4.0536022 | 1.99E-46    | CD630_36680 |
| CDR20291_3530 | putative selenocysteine lyase                 | -8.2372888 | 5.54E-43    | CD630_36700 |
| CDR20291_3535 | glucose inhibited division protein A          | -10.595039 | 4.72E-07    | CD630_36750 |
| CDR20291_3536 | putative tRNA modification GTPase             | -10.052609 | 1.54E-07    | CD630_36760 |
| CDR20291_3537 | SpoIIJ-associated protein                     | -9.8101108 | 5.47E-07    | CD630_36770 |
| CDR20291_3538 | putative sporulation membrane protein         | -8.6838153 | 3.08E-05    | CD630_36780 |
| CDR20291_3539 | conserved hypothetical protein                | -9.6981636 | 1.51E-06    | CD630_36781 |
| CDR20291_3548 | putative exported protein                     | -11.980904 | 3.27E-13    | CD630_00070 |
| CDR20291_3549 | putative membrane protein                     | -5.8561275 | 8.42E-06    | CD630_00080 |
| CDR20291_3550 | anti-sigma-B factor antagonist                | -10.048784 | 9.88E-15    | CD630_00090 |
| CDR20291_3551 | anti-sigma-B factor (serine-protein kinase)   | -3.5362854 | 5.25E-17    | CD630_00100 |
| CDR20291_3552 | RNA polymerase sigma-B factor                 | -12.563834 | 4.83E-20    | CD630_00110 |
